# Supplementary material for: Identification and synthesis of impurities formed during sertindole preparation
Source: publisher site journal article supplement (doi:10.3762/bjoc.7.5), 2011-01-07

## **Supporting Information**

**for**

### **Identification and synthesis of impurities formed during sertindole preparation**

I. V. Sunil Kumar<sup>\*1</sup>, G. S. R. Anjaneyulu<sup>1</sup> and V. Hima Bindu<sup>2</sup>

Address: <sup>1</sup>Research and Development Centre, Aptuit Laurus Private Limited, ICICI Knowledge Park, Turkapally, Shameerpet, Hyderabad-500078, India and <sup>2</sup>Institute of Science and Technology, JNTU, Hyderabad-500072, India

Email: I. V. Sunil Kumar - sunil.indukuri@aptuitlaurus.com

\*Corresponding author

### **Supporting Information File 2:**

**<sup>1</sup>H and <sup>13</sup>C NMR spectral data and HPLC chromatograms for all new compounds**

## Table of contents

|    |                                                                            |    |
|----|----------------------------------------------------------------------------|----|
| 1) | HPLC chromatograms, $^1\text{H}$ and $^{13}\text{C}$ NMR spectral data of: |    |
|    | a) Des-chloro sertindole (2)                                               | 3  |
|    | b) Des-fluoro sertindole (3)                                               | 6  |
|    | c) Anhydro sertindole (5)                                                  | 9  |
|    | d) Nor-sertindole (9)                                                      | 12 |
|    | e) 1-(4-Bromophenyl) impurity (21)                                         | 15 |
|    | f) 5-Bromo sertindole (27)                                                 | 18 |
|    | g) Bis-alkylated impurity (28)                                             | 21 |
|    | h) Sertindole-N-oxide (29)                                                 | 24 |
| 2) | HPLC chromatogram – Sertindole spiked with process related impurities      | 27 |
| 3) | HPLC chromatogram and LC-MS fragmentation data                             | 29 |

1H NMR of Q080/2059/003 in DMSO-d6  
 Date:- 02/06/09 ARNO : SE0509/027  
 {C:/LKT/Structure elucidation/May2009/94/1}

Des-chloro 2

7.654  
7.630  
7.598  
7.582  
7.568  
7.552  
7.461  
7.434  
7.393  
7.370  
7.364  
7.335  
7.180  
7.176  
7.157  
7.153  
7.130  
7.126  
7.107  
7.104  
7.081  
7.058  
7.055  
6.214

3.397  
3.373  
3.364  
3.345  
3.209  
3.183  
3.162  
3.140  
3.005  
2.967  
2.819  
2.792  
2.780  
2.769  
2.741  
2.485  
2.479  
2.473  
2.467  
2.461  
2.433  
2.411  
2.388  
2.125  
2.087  
2.053  
1.971  
1.934  
1.718  
1.708  
1.677  
1.667

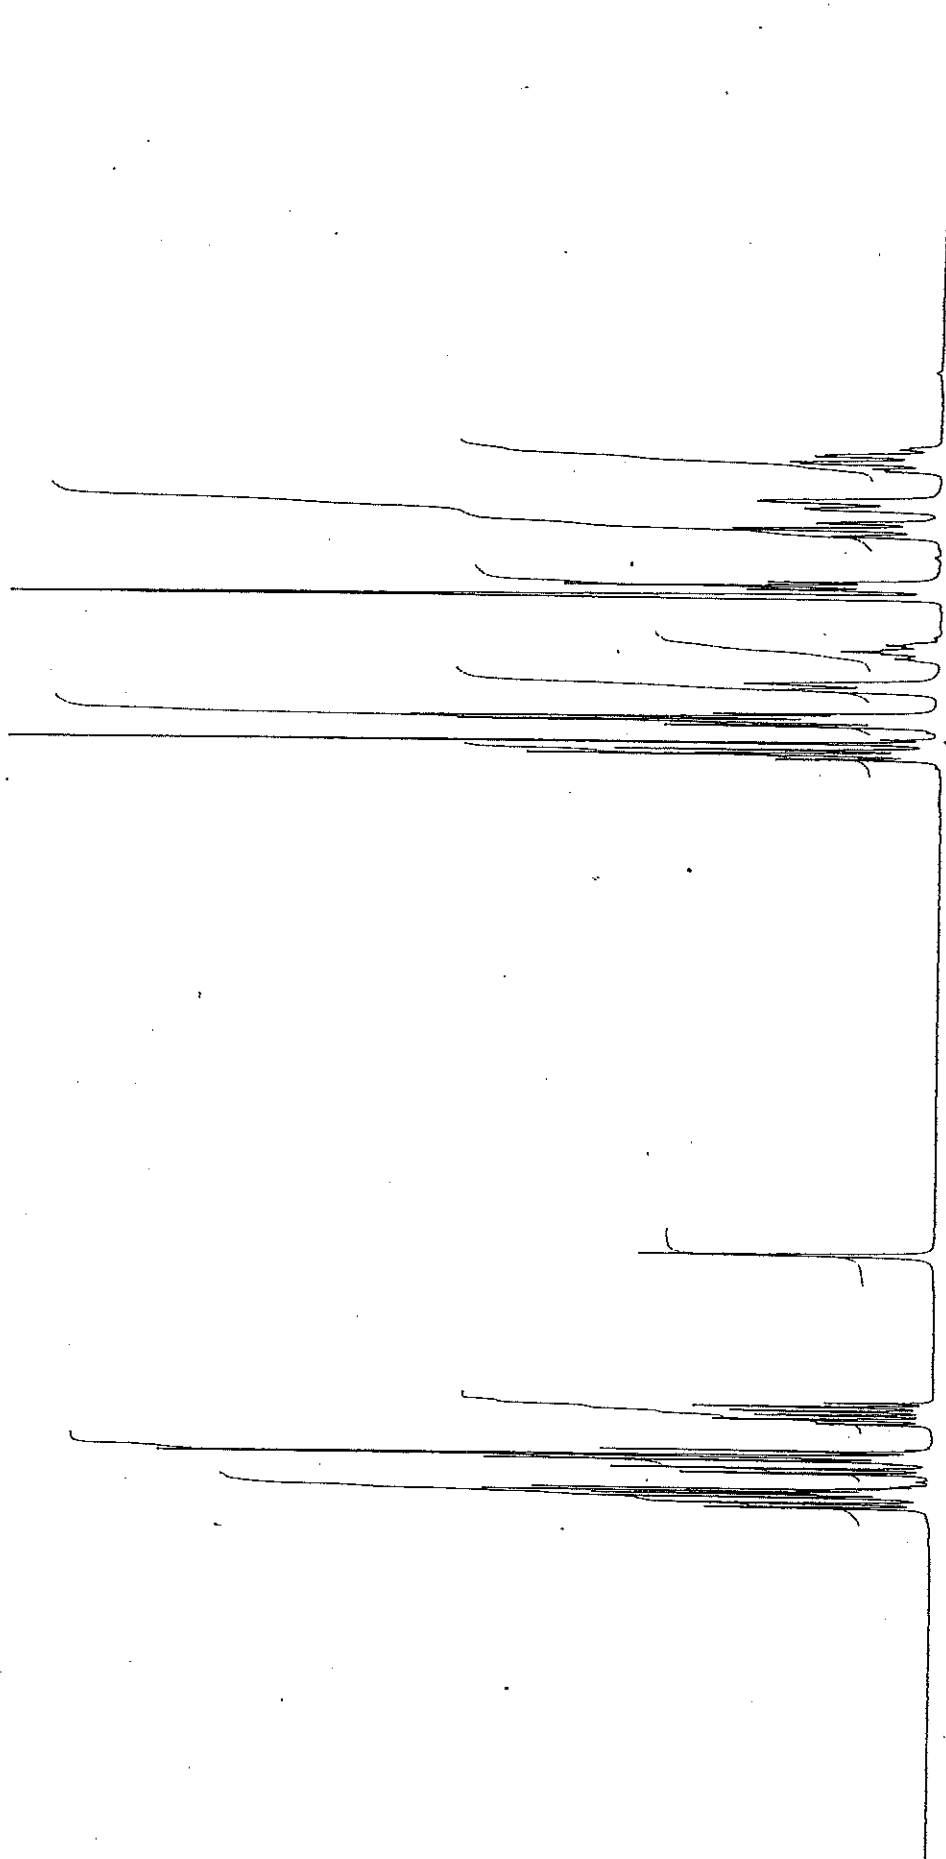

9.5 9.0 8.5 8.0 7.5 7.0 6.5 6.0 5.5 5.0 4.5 4.0 3.5 3.0 2.5 2.0 1.5 1.0 0.5 0.0 ppm

3.213  
3.957  
2.000  
0.984  
2.036  
4.083  
2.080  
1.080  
1.990  
4.112  
2.070

2.166109

13C NMR of 0080/2059/003 in DMSO-d6  
Date:- 02/06/09 ARNo :SE0509/027  
{C:/LKT/Structure elucidation/May2009/98/1}

aptuit laurus

Des-chloro 2

162.51  
161.99  
158.77  
136.01  
135.98  
135.90  
128.18  
126.11  
126.00  
124.47  
122.71  
122.40  
120.05  
119.73  
116.97  
116.67  
110.54

56.54  
54.19  
45.25  
40.74  
40.46  
40.18  
39.91  
39.63  
39.35  
39.07  
37.86  
33.29  
32.95

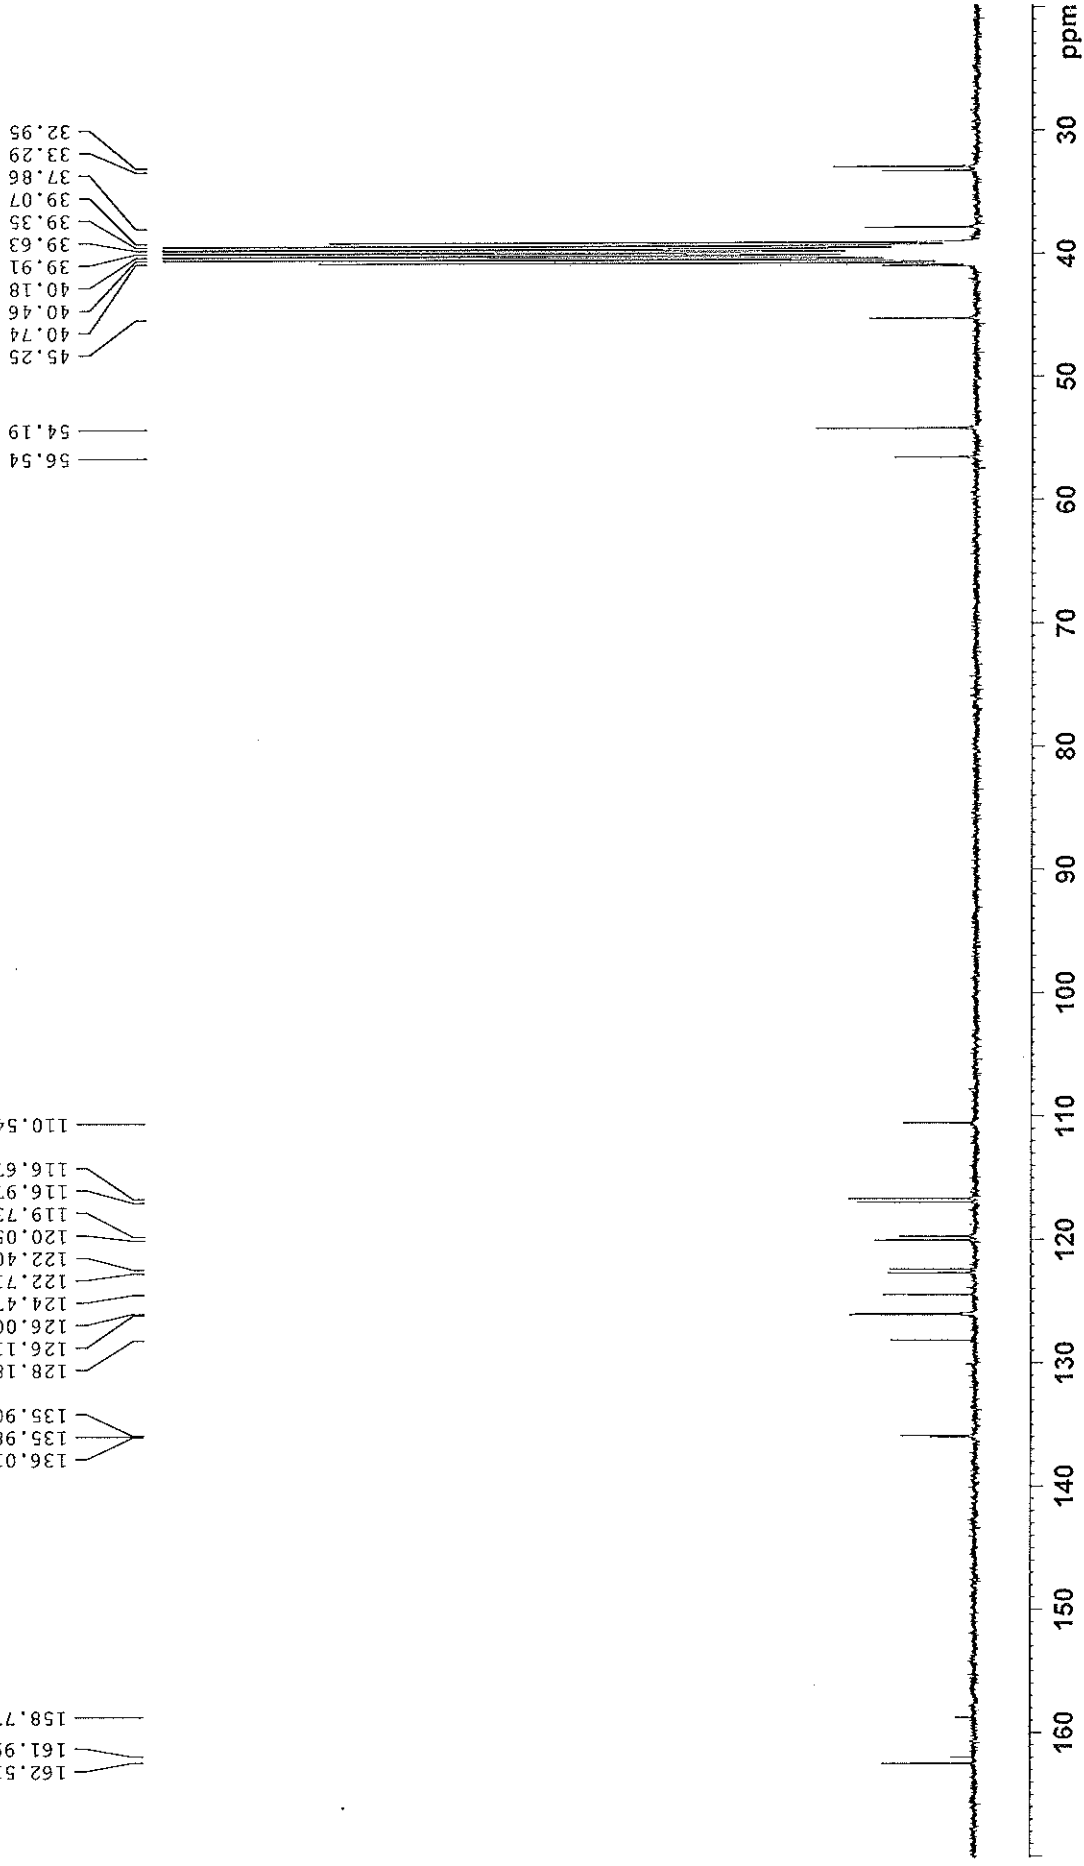

Analyst: Lakshmi Kumar.Tatini

## SAMPLE INFORMATION

|                   |                             |                      |                               |
|-------------------|-----------------------------|----------------------|-------------------------------|
| Sample Name:      | 0080/AST-imp/2059/003 pre-1 | Instrument Method Id | 4820                          |
| Sample Type:      | Unknown                     | Acquired By:         | Analyst                       |
| Vial:             | 58                          | Date Acquired:       | 7/31/2009 2:33:26 AM IST      |
| Injection #:      | 1                           | Date Processed:      | 7/31/2009 9:49:56 AM IST      |
| Injection Volume: | 10.00 ul                    | Processing Method:   | 0080_RS                       |
| Sample Set Id     | 5596                        | Processing Method Id | 5731                          |
| Sample Set Name:  | 300709 01                   | Proc. Chnl. Descr.:  | VWD AU On nm                  |
| Project Name:     | Sertindole_July_09          | System Name          | LL_AD_LC_SYS011               |
| Result Id         | 5746                        | Result Set Id        |                               |
|                   |                             | Software:            | Empower 2 Software Build 2154 |

Auto-Scaled Chromatogram

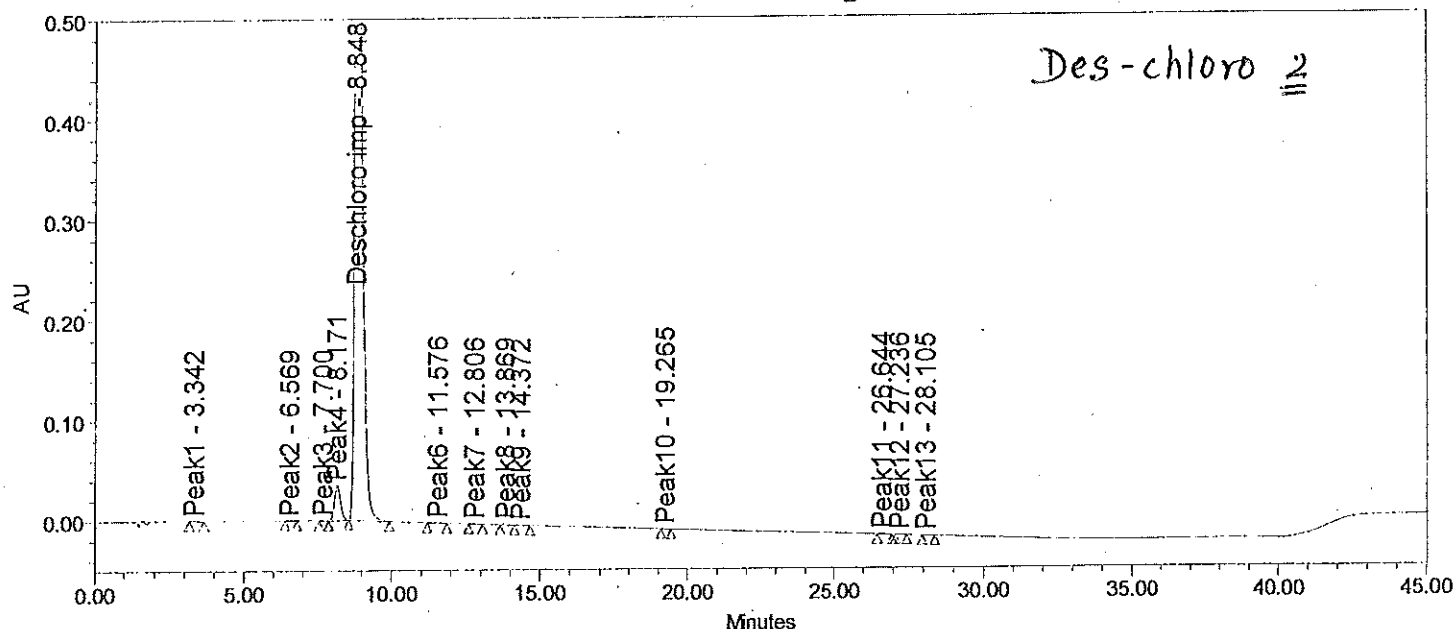

Peak Results

|    | Name          | RT    | Area<br>( $\mu\text{V}\cdot\text{sec}$ ) | % Area | RT Ratio | USP<br>Resolution | USP<br>Tailing | USP<br>Plate Count |
|----|---------------|-------|------------------------------------------|--------|----------|-------------------|----------------|--------------------|
| 1  | Peak1         | 3.34  | 6067.41                                  | 0.04   | 0.38     |                   | 1.34           | 1214               |
| 2  | Peak2         | 6.57  | 1798.65                                  | 0.01   | 0.74     | 8.46              | 1.02           | 2302               |
| 3  | Peak3         | 7.70  | 1917.25                                  | 0.01   | 0.87     | 3.24              | 1.04           | 15365              |
| 4  | Peak4         | 8.17  | 501604.51                                | 3.45   | 0.92     | 1.32              | 1.19           | 7448               |
| 5  | Deschloro imp | 8.85  | 13956027.74                              | 96.11  | 1.00     | 1.66              | 1.65           | 7064               |
| 6  | Peak6         | 11.58 | 9009.57                                  | 0.06   | 1.31     | 5.56              | 0.87           | 6036               |
| 7  | Peak7         | 12.81 | 4204.26                                  | 0.03   | 1.45     | 2.93              | 1.04           | 20843              |
| 8  | Peak8         | 13.87 | 16011.02                                 | 0.11   | 1.57     | 3.14              | 1.15           | 19867              |
| 9  | Peak9         | 14.37 | 6659.43                                  | 0.05   | 1.62     | 1.30              | 1.14           | 25101              |
| 10 | Peak10        | 19.27 | 3827.95                                  | 0.03   | 2.18     | 14.28             | 0.94           | 76063              |
| 11 | Peak11        | 26.64 | 8441.21                                  | 0.06   | 3.01     | 19.79             | 1.32           | 48031              |
| 12 | Peak12        | 27.24 | 2521.73                                  | 0.02   | 3.08     | 1.44              | 1.07           | 121292             |

SampleName 0080/AST-imp/2059/003 pre-1

Date Acquired 7/31/2009 2:33:26 AM IST

Signature / Date: *[Signature]* 7/31/09

Page: 1 of 2

<sup>1</sup>H NMR of 0080/2198/164 in DMSO-d<sub>6</sub>  
 Date:- 06/08/09 ARNO :SE0809/06  
 {C:/LKT/Structure elucidation/Aug-2009/20/1

Des-fluoro 3

7.690  
 7.684  
 7.540  
 7.526  
 7.514  
 7.485  
 7.385  
 7.370  
 7.355  
 7.341  
 7.164  
 7.157  
 7.135  
 7.128

6.210

3.393  
 3.368  
 3.360  
 3.340  
 3.308  
 3.308  
 3.208  
 3.181  
 3.159  
 3.136  
 2.989  
 2.951  
 2.814  
 2.774  
 2.735  
 2.485  
 2.479  
 2.473  
 2.467  
 2.462  
 2.426  
 2.404  
 2.381  
 2.120  
 2.083  
 2.057  
 2.048  
 1.950  
 1.914  
 1.722  
 1.691  
 1.682  
 1.651  
 1.642  
 1.611  
 1.601

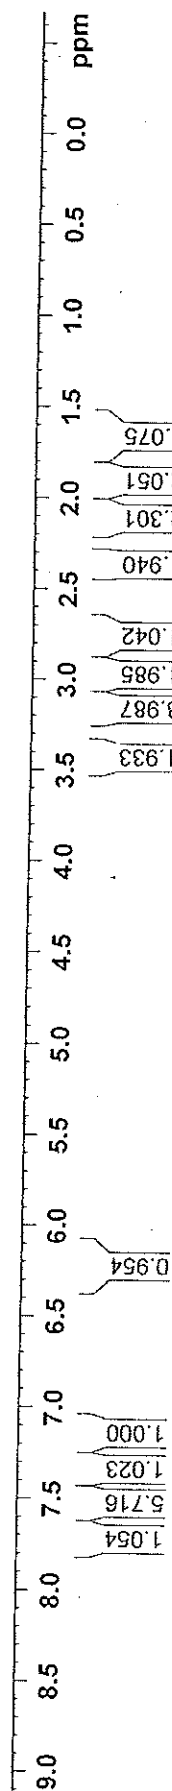

Analyst: Suresh Kumar.K

06/08/09

13C NMR of 0080/A-imp/2198/164 in DMSO-d6  
Date:- 14/09/10  
{D:/LKT/aptit laurus/September-2010/178/1}

aptit laurus

Des-fluoro 3

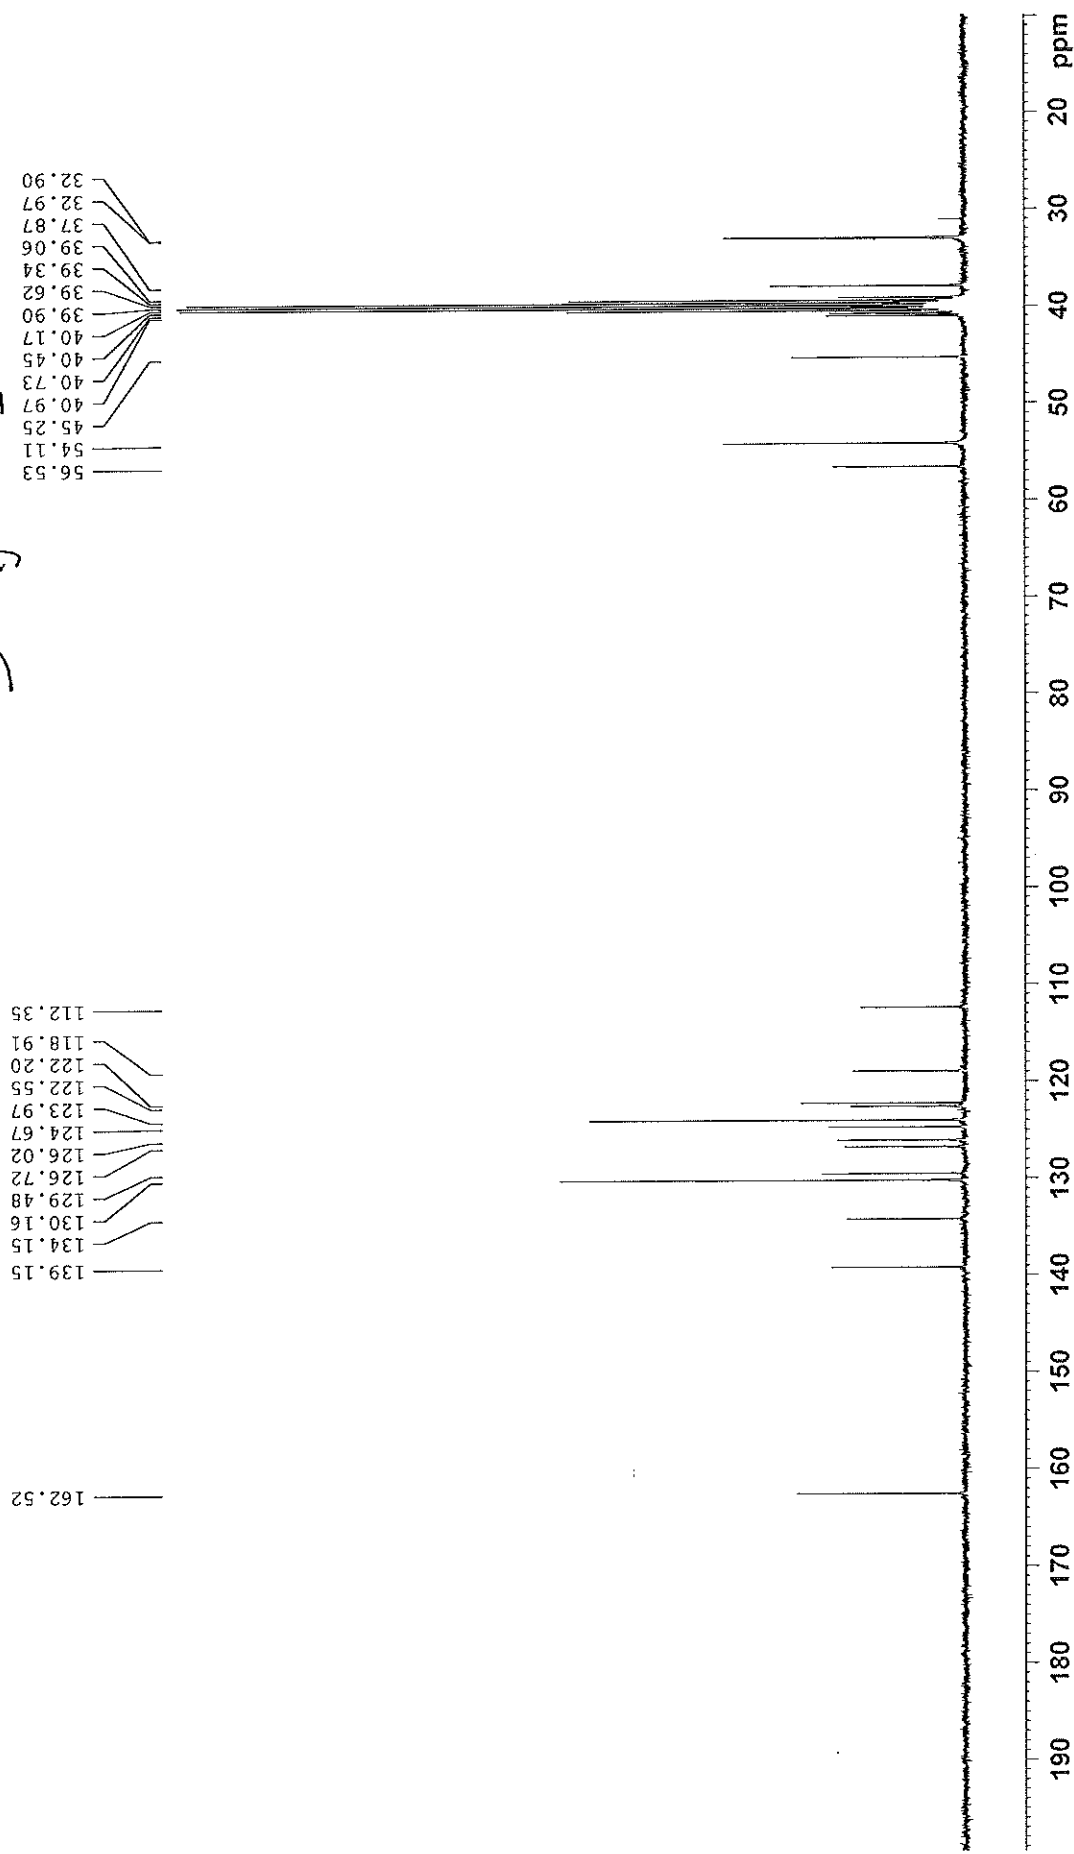

Analyst: Srikanth.M

## SAMPLE INFORMATION

Sample Name: 0080/2198/164(Desfluoro)Pre-1  
Sample Type: Unknown  
Vial: 59  
Injection #: 1  
Injection Volume: 10.00 ul  
Sample Set Id 6733  
Sample Set Name: 040809\_01  
Project Name: Sertindole\_July\_09  
Result Id 7014 Result Set Id

Instrument Method Id 6729  
Acquired By: Analyst  
Date Acquired: 8/5/2009 10:32:10 AM IST  
Date Processed: 8/5/2009 11:55:47 AM IST  
Processing Method: 0080\_Stage123\_RS  
Processing Method Id 6996  
Proc. Chnl. Descr.:  
System Name LL\_AD\_LC\_SYS006  
Software: Empower 2 Software Build 2154

Auto-Scaled Chromatogram

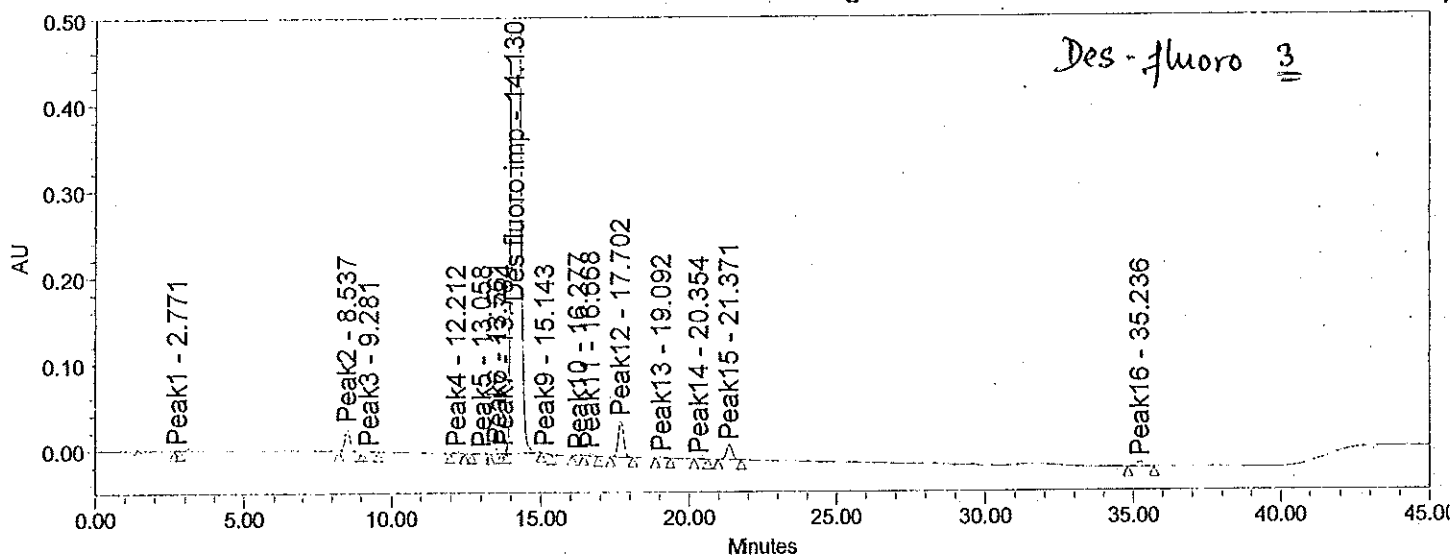

Peak Results

|    | Name           | RT    | Area<br>( $\mu\text{V}\cdot\text{sec}$ ) | % Area | RT Ratio | USP<br>Resolution | USP<br>Tailing | USP<br>Plate Count |
|----|----------------|-------|------------------------------------------|--------|----------|-------------------|----------------|--------------------|
| 1  | Peak1          | 2.77  | 9367.56                                  | 0.03   | 0.20     |                   | 0.97           | 6270               |
| 2  | Peak2          | 8.54  | 315026.63                                | 1.09   | 0.60     | 25.76             | 1.12           | 12987              |
| 3  | Peak3          | 9.28  | 8431.83                                  | 0.03   | 0.66     | 2.26              | 1.41           | 11458              |
| 4  | Peak4          | 12.21 | 23863.12                                 | 0.08   | 0.86     | 8.66              | 1.12           | 23397              |
| 5  | Peak5          | 13.06 | 29652.15                                 | 0.10   | 0.92     | 2.05              | 0.85           | 12827              |
| 6  | Peak6          | 13.56 | 61613.31                                 | 0.21   | 0.96     | 1.22              |                | 33573              |
| 7  | Peak7          | 13.78 | 23970.56                                 | 0.08   | 0.98     |                   |                |                    |
| 8  | Des fluoro imp | 14.13 | 27411722.68                              | 94.96  | 1.00     |                   | 1.35           | 22506              |
| 9  | Peak9          | 15.14 | 23009.95                                 | 0.08   | 1.07     | 3.10              | 1.45           | 50407              |
| 10 | Peak10         | 16.28 | 16785.55                                 | 0.06   | 1.15     | 4.05              | 0.92           | 51175              |
| 11 | Peak11         | 16.67 | 41175.82                                 | 0.14   | 1.18     | 1.19              | 1.15           | 33289              |
| 12 | Peak12         | 17.70 | 543571.51                                | 1.88   | 1.25     | 2.90              | 1.10           | 43760              |
| 13 | Peak13         | 19.09 | 24241.61                                 | 0.08   | 1.35     | 4.03              | 1.17           | 50389              |
| 14 | Peak14         | 20.35 | 4448.94                                  | 0.02   | 1.44     | 3.61              | 1.39           | 53655              |
| 15 | Peak15         | 21.37 | 232405.96                                | 0.81   | 1.51     | 2.83              | 1.09           | 57013              |

SampleName 0080/2198/164(Desfluoro)Pre-1

Date Acquired 8/5/2009 10:32:10 AM IST

Signature / Date: *VGO* / 05/08/09

Page: 1 of 2



Anhydro S

1H NMR of 0080/1847/031 in DMSO-d6  
 Date: 07/04/09 AR.No: SE0409/01  
 {C:/LKT/apruit Laurus/April 2009/21/1}

7.890  
7.883  
7.723  
7.630  
7.614  
7.600  
7.584  
7.458  
7.428  
7.395  
7.366  
7.214  
7.207  
7.184  
7.178

6.225  
6.170

3.395  
3.371  
3.364  
3.344  
3.321  
3.227  
3.206  
3.181  
3.153  
2.666  
2.648  
2.630  
2.515  
2.494  
2.486  
2.479  
2.473  
2.468

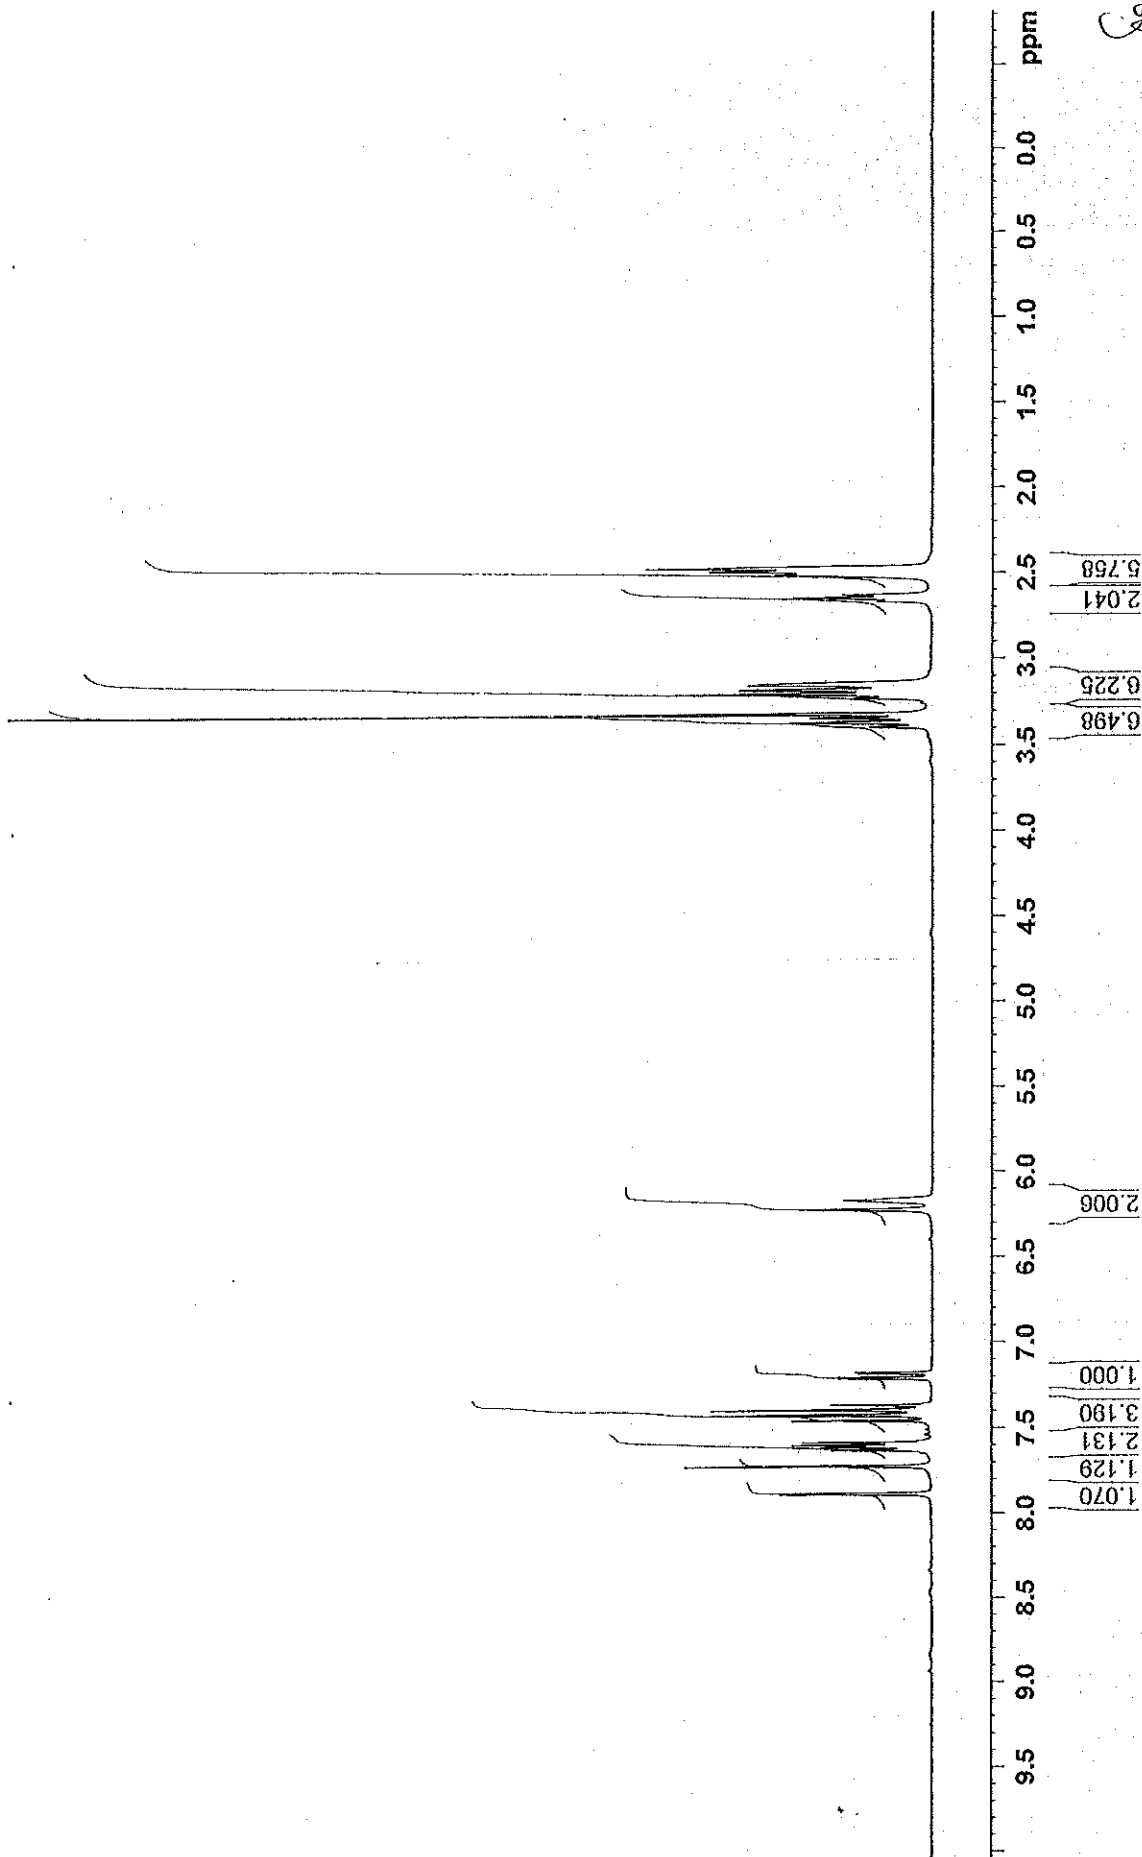

07/04/09

13C NMR of 0080/1847/031 in DMSO-d6  
Date:04/04/09 AR.No:SE0409/01  
{C:/LKT/aptuit Laurus/April 2009/11/1}

aptuit laurus  
Anhydro

162.53  
159.32  
135.11  
135.07  
128.65  
127.96  
127.39  
126.79  
126.68  
125.68  
122.92  
120.58  
120.16  
117.80  
117.12  
116.81  
112.44

55.92  
53.10  
50.14  
45.13  
40.87  
40.70  
40.42  
40.14  
39.86  
39.58  
39.31  
39.03  
37.83  
28.91

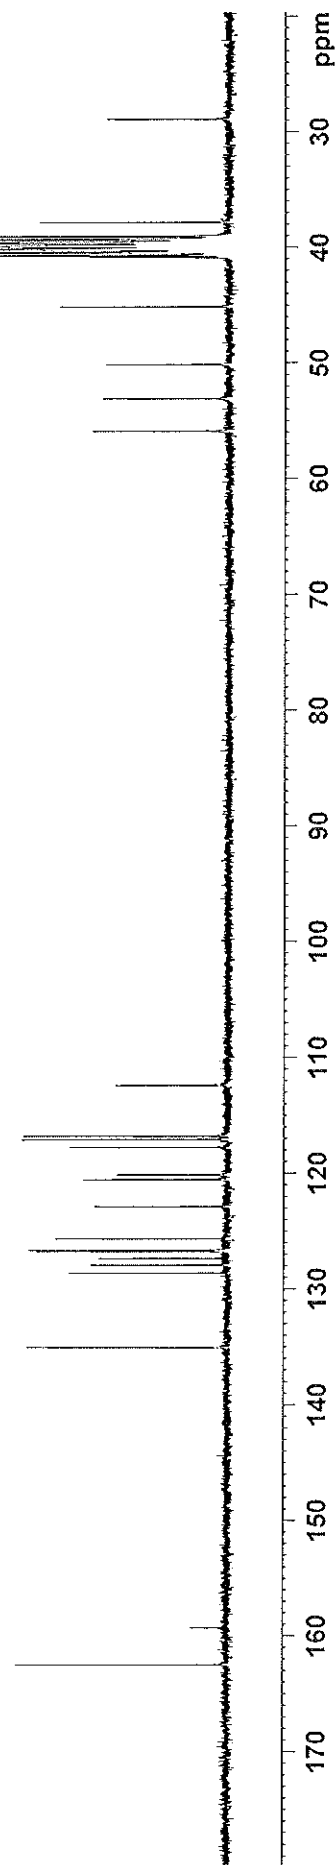

Analyst: Lakshmi Kumar.Tatini

## SAMPLE INFORMATION

Sample Name: 0080/AST-imp/1847/031pre-1  
 Sample Type: Unknown  
 Vial: 56  
 Injection #: 1  
 Injection Volume: 10.00 ul  
 Sample Set Id 5596  
 Sample Set Name: 300709 01  
 Project Name: Sertindole\_July\_09  
 Result Id 5729 Result Set Id

Instrument Method Id 4820

Acquired By: Analyst  
 Date Acquired: 7/31/2009 12:59:11 AM IST  
 Date Processed: 7/31/2009 9:40:50 AM IST  
 Processing Method: 0080\_RS  
 Processing Method Id 5700  
 Proc. Chnl. Descr.: VWD AU On nm  
 System Name LL\_AD\_LC\_SYS011  
 Software: Empower 2 Software Build 2154

## Auto-Scaled Chromatogram

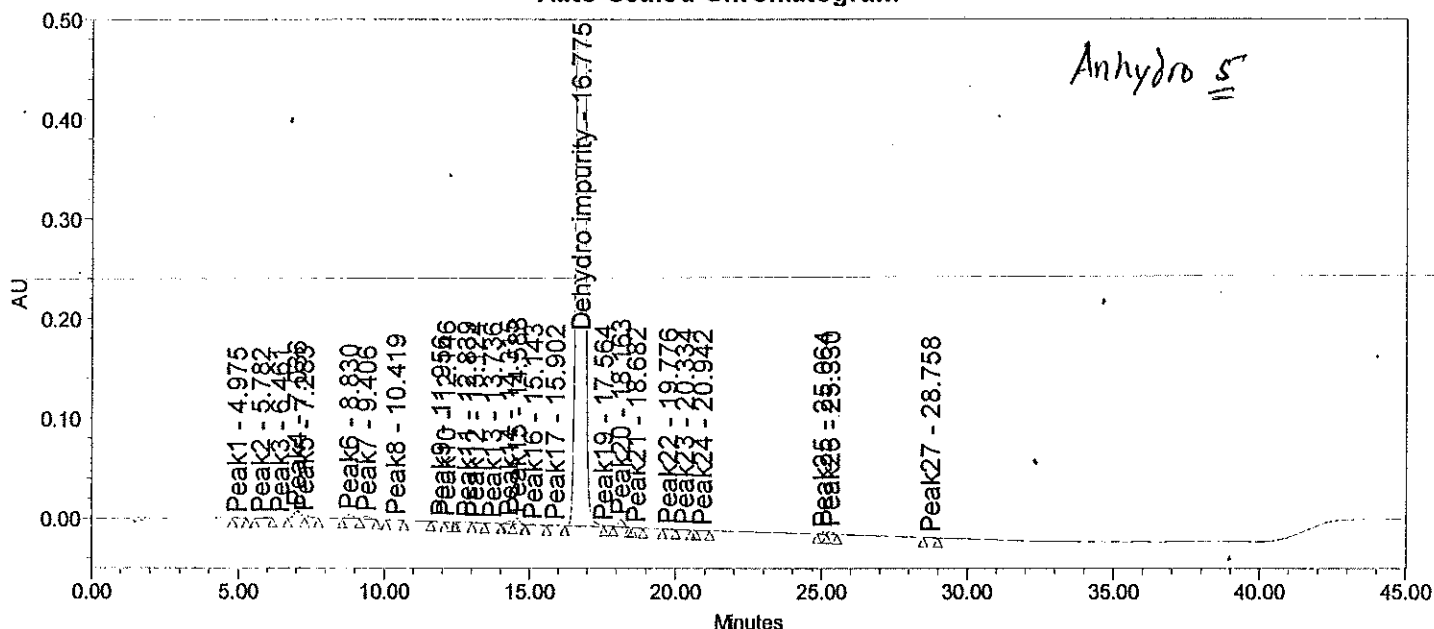

## Peak Results

|    | Name   | RT    | Area<br>( $\mu\text{V}\cdot\text{sec}$ ) | % Area | RT Ratio | USP<br>Resolution | USP<br>Tailing | USP<br>Plate Count |
|----|--------|-------|------------------------------------------|--------|----------|-------------------|----------------|--------------------|
| 1  | Peak1  | 4.97  | 4235.71                                  | 0.01   | 0.30     |                   | 1.12           | 3159               |
| 2  | Peak2  | 5.78  | 4677.11                                  | 0.02   | 0.34     | 2.14              | 1.09           | 2329               |
| 3  | Peak3  | 6.46  | 3155.47                                  | 0.01   | 0.39     | 1.59              | 0.85           | 2132               |
| 4  | Peak4  | 7.04  | 105617.05                                | 0.37   | 0.42     | 1.35              |                | 4212               |
| 5  | Peak5  | 7.28  | 25931.05                                 | 0.09   | 0.43     |                   |                |                    |
| 6  | Peak6  | 8.83  | 60238.89                                 | 0.21   | 0.53     |                   | 1.18           | 7101               |
| 7  | Peak7  | 9.41  | 36308.64                                 | 0.13   | 0.56     | 1.39              | 1.21           | 8564               |
| 8  | Peak8  | 10.42 | 12944.27                                 | 0.05   | 0.62     | 2.16              | 0.84           | 7135               |
| 9  | Peak9  | 11.96 | 12461.13                                 | 0.04   | 0.71     |                   |                |                    |
| 10 | Peak10 | 12.15 | 9117.20                                  | 0.03   | 0.72     |                   |                |                    |
| 11 | Peak11 | 12.84 | 15091.42                                 | 0.05   | 0.77     |                   |                |                    |
| 12 | Peak12 | 13.12 | 7469.25                                  | 0.03   | 0.78     |                   |                |                    |

SampleName 0080/AST-imp/1847/031pre-1

Date Acquired 7/31/2009 12:59:11 AM IST

Signature / Date: *Voo*  
21/07/09

Page: 1 of 2

<sup>1</sup>H NMR of 0080/Ast-2/2198/121 in DMSO-d6  
 Date:- 31/07/09 ARNo : SE0709/024  
 {C:/LKT/Structure elucidation/July2009/59/1

Nor-Sertmole 9

7.783  
 7.777  
 7.591  
 7.575  
 7.568  
 7.561  
 7.545  
 7.458  
 7.442  
 7.413  
 7.397  
 7.368  
 7.338  
 7.166  
 7.159  
 7.136  
 7.130

3.167  
 3.126  
 3.017  
 2.989  
 2.978  
 2.967  
 2.938  
 2.835  
 2.828  
 2.795  
 2.786  
 2.754  
 2.746  
 2.486  
 2.480  
 2.474  
 2.467  
 2.462  
 1.980  
 1.970  
 1.932  
 1.772  
 1.735  
 1.724

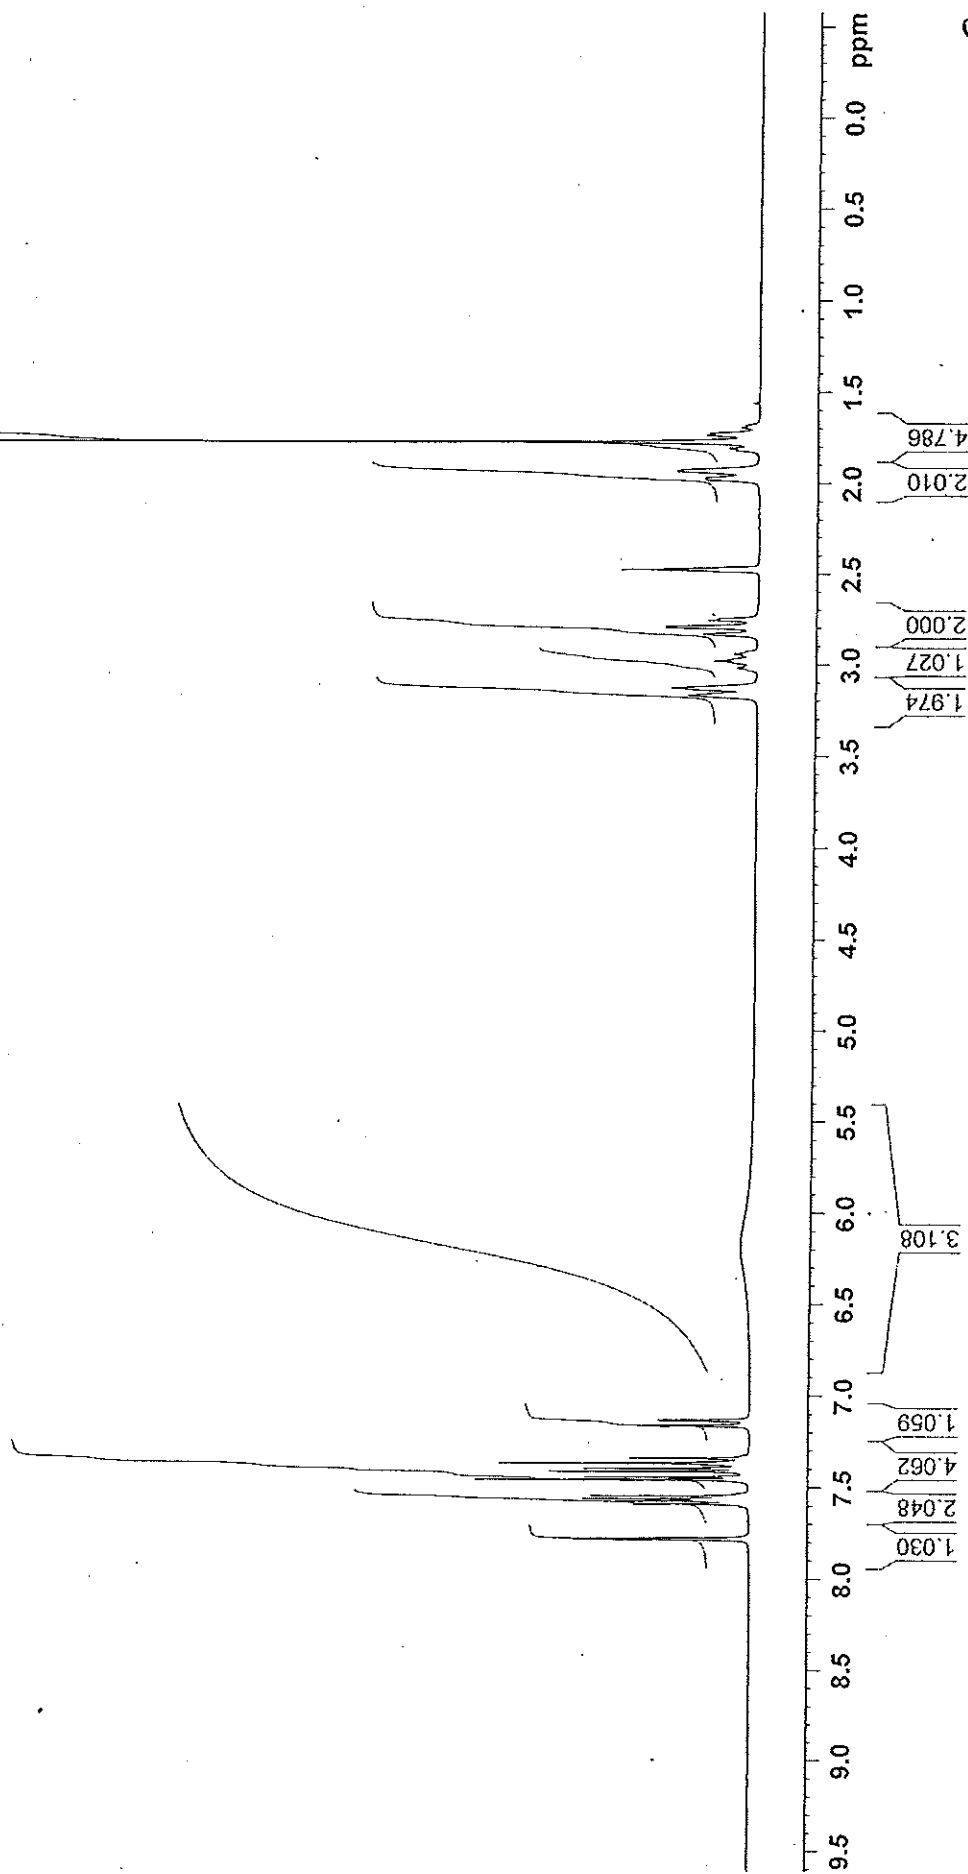

Analyst: Suresh Kumar.K

13C NMR of 0080/Ast-2/2198/121 in DMSO-d6  
Date:- 31/07/09 ARNo :SE0709/024  
{C:/LKT/Structure elucidation/July2009/62/1}

aptut laurus  
Nor-Sentindol g

173.78  
162.30  
159.07  
135.46  
135.43  
134.52  
129.01  
126.37  
126.26  
124.75  
122.66  
121.78  
119.08  
117.05  
116.75  
112.27

45.15  
40.73  
40.46  
40.18  
39.90  
39.62  
39.34  
39.07  
32.54  
31.67  
23.25

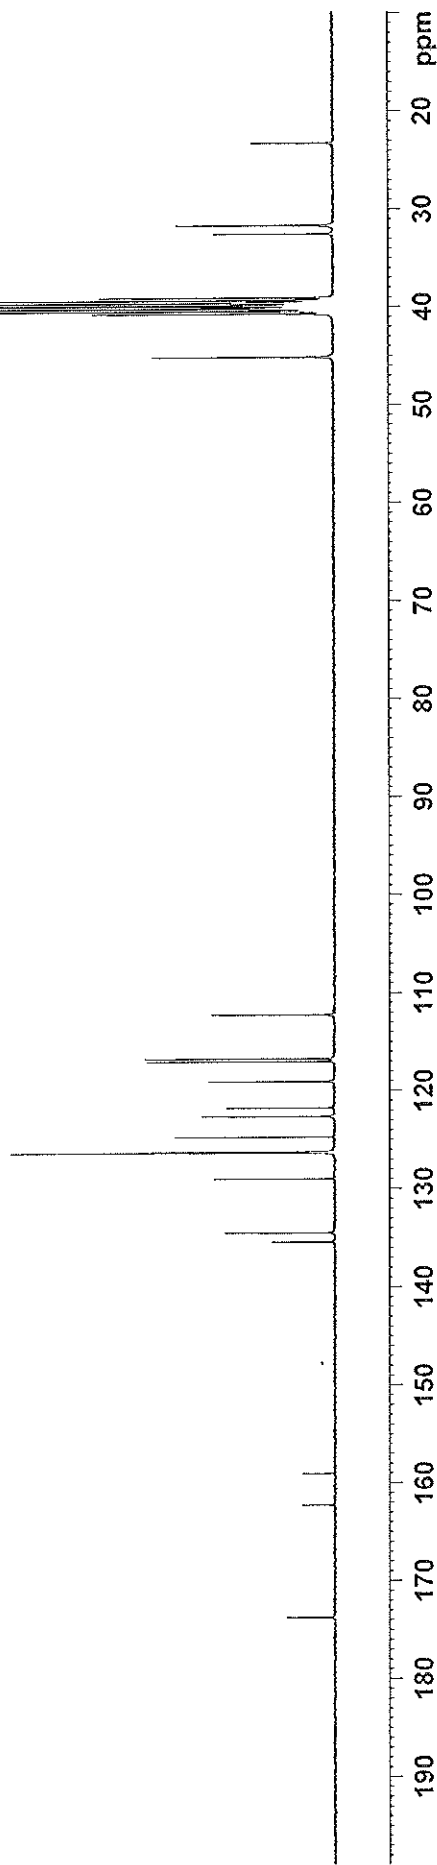

Analyst: Lakshmi Kumar.Tatini

## SAMPLE INFORMATION

|                                                                                                                                                                                                                                                          |                                                                                                                                                                                                                                                                                                                    |
|----------------------------------------------------------------------------------------------------------------------------------------------------------------------------------------------------------------------------------------------------------|--------------------------------------------------------------------------------------------------------------------------------------------------------------------------------------------------------------------------------------------------------------------------------------------------------------------|
| Sample Name: 0080/A St-2/2198/121 pre-1<br>Sample Type: Unknown<br>Vial: 54<br>Injection #: 1<br>Injection Volume: 10.00 ul<br>Sample Set Id 5596<br>Sample Set Name: 300709 01<br>Project Name: Sertindole_July_09<br>Result Id 5694      Result Set Id | Instrument Method Id 4820<br>Acquired By: Analyst<br>Date Acquired: 7/30/2009 11:25:07 PM IST<br>Date Processed: 7/31/2009 9:37:05 AM IST<br>Processing Method: 0080_RS<br>Processing Method Id 5686<br>Proc. Chnl. Descr.: VWD AU On nm<br>System Name LL_AD_LC_SYS011<br>Software: Empower 2 Software Build 2154 |
|----------------------------------------------------------------------------------------------------------------------------------------------------------------------------------------------------------------------------------------------------------|--------------------------------------------------------------------------------------------------------------------------------------------------------------------------------------------------------------------------------------------------------------------------------------------------------------------|

### Auto-Scaled Chromatogram

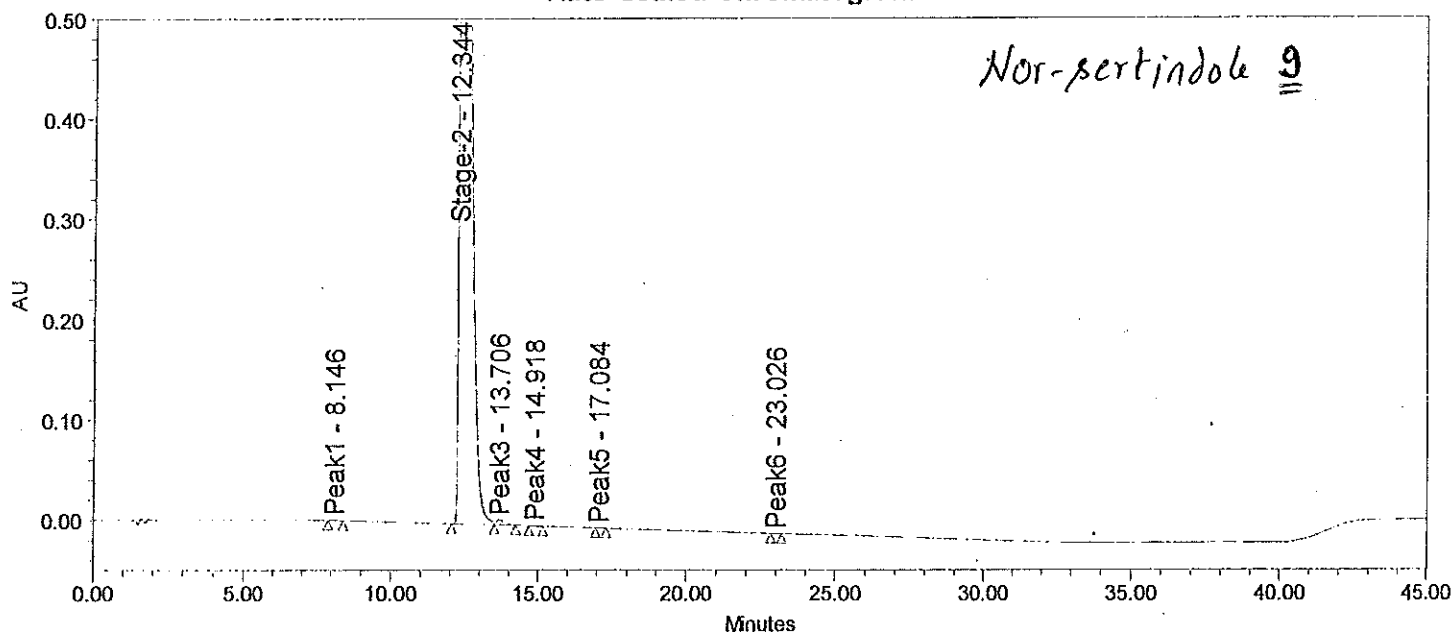

### Peak Results

|   | Name    | RT    | Area<br>( $\mu\text{V}\cdot\text{sec}$ ) | %Area | RT Ratio | USP<br>Resolution | USP<br>Tailing | USP<br>Plate Count |
|---|---------|-------|------------------------------------------|-------|----------|-------------------|----------------|--------------------|
| 1 | Peak1   | 8.15  | 6350.47                                  | 0.02  | 0.66     |                   | 1.01           | 7002               |
| 2 | Stage-2 | 12.34 | 28374700.77                              | 99.61 | 1.00     | 8.07              | 3.15           | 6914               |
| 3 | Peak3   | 13.71 | 94258.59                                 | 0.33  | 1.11     |                   |                |                    |
| 4 | Peak4   | 14.92 | 5302.13                                  | 0.02  | 1.21     |                   | 1.04           | 30829              |
| 5 | Peak5   | 17.08 | 2242.89                                  | 0.01  | 1.38     | 6.89              | 1.21           | 184174             |
| 6 | Peak6   | 23.03 | 1774.47                                  | 0.01  | 1.87     | 19.19             | 0.86           | 75973              |

1H NMR of 0080/2246/117 in DMSO-d6  
 Date:- 28/08/09 ARNO :SE0809/033  
 (C:/LKT/Structure elucidation/Aug-2009/72/1

1-(4-Bromophenyl) 21

7.722  
7.716  
7.698  
7.693  
7.543  
7.533  
7.529  
7.503  
7.181  
7.174  
7.152  
7.145

3.393  
3.369  
3.360  
3.341  
3.304  
3.208  
3.181  
3.158  
3.136  
2.989  
2.952  
2.809  
2.770  
2.731  
2.485  
2.480  
2.474  
2.468  
2.462  
2.426  
2.404  
2.382  
2.120  
2.084  
2.057  
2.047  
1.947  
1.907  
1.680  
1.671  
1.640  
1.631

6.209

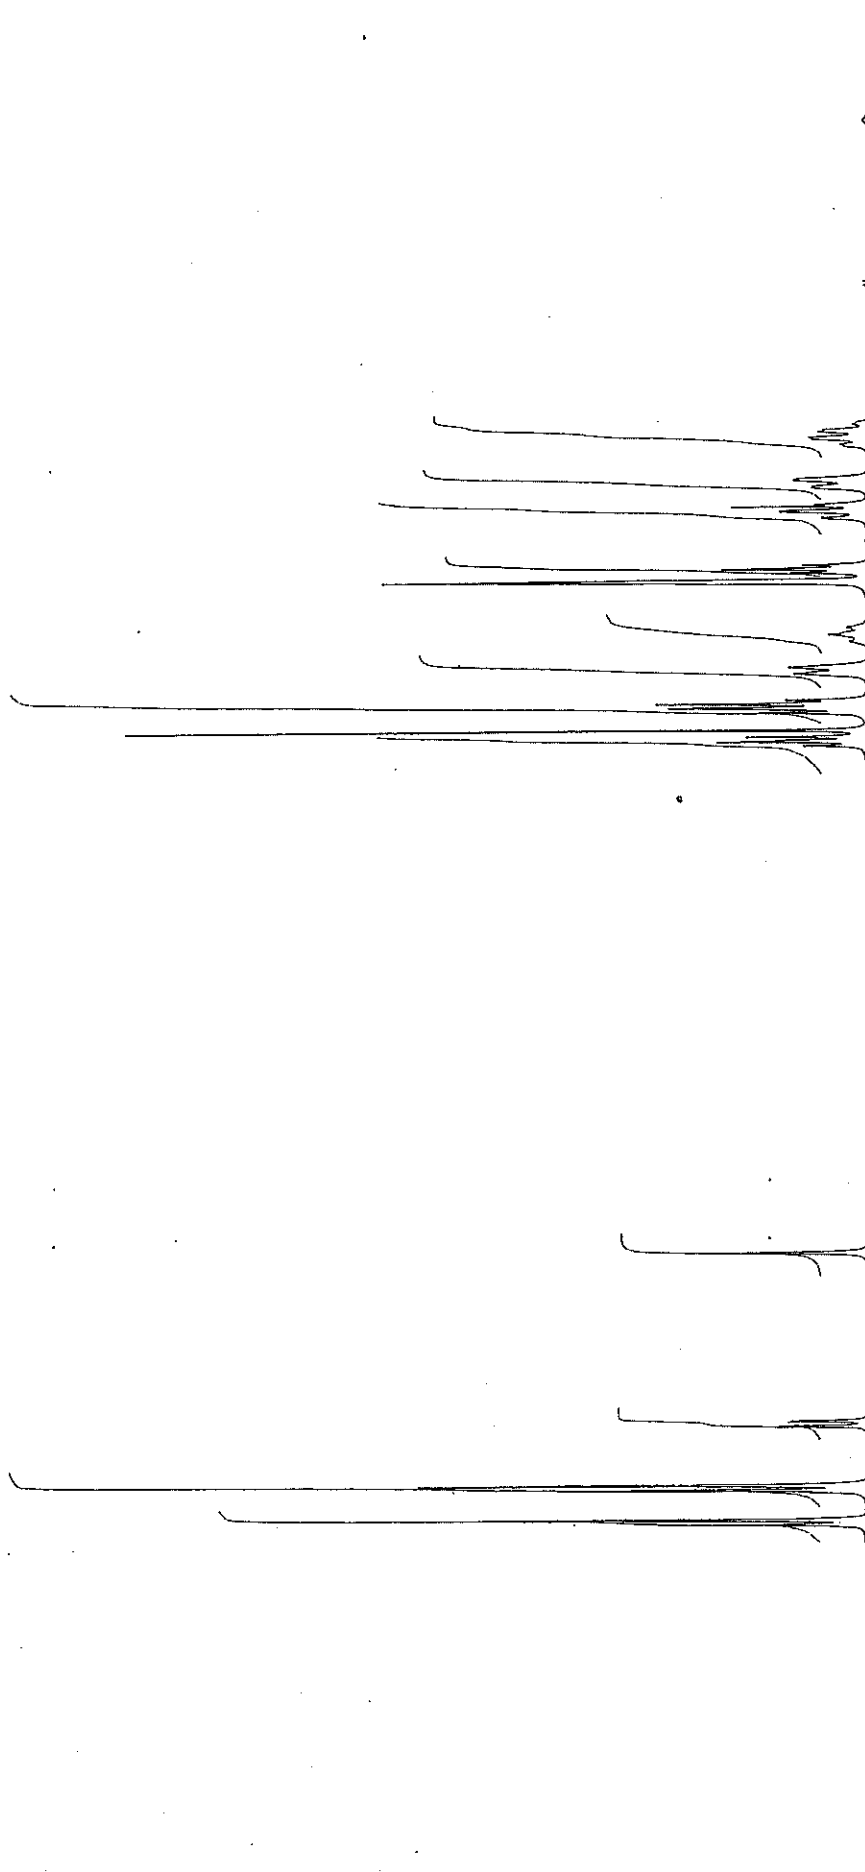

9.5 9.0 8.5 8.0 7.5 7.0 6.5 6.0 5.5 5.0 4.5 4.0 3.5 3.0 2.5 2.0 1.5 1.0 0.5 0.0 ppm

3.028  
4.076  
1.000  
0.989  
2.232  
4.067  
2.010  
1.067  
1.877  
2.220  
1.987  
1.931

Analyst: Suresh Kumar.K

28/08/09

<sup>13</sup>C NMR of 0080/2246/117 in DMSO-d6  
 Date:- 28/08/09 ARNO : SE0809/033  
 {C:/LKT/Structure elucidation/Aug-2009/75/1}

aptut laurus

i-(4-Bromophenyl)

21

162.51  
 138.43  
 134.01  
 133.00  
 129.66  
 125.93  
 124.93  
 122.76  
 122.68  
 119.02  
 112.39

45.25  
 40.75  
 40.47  
 40.19  
 39.91  
 39.63  
 39.36  
 39.08  
 37.86  
 32.90  
 32.86

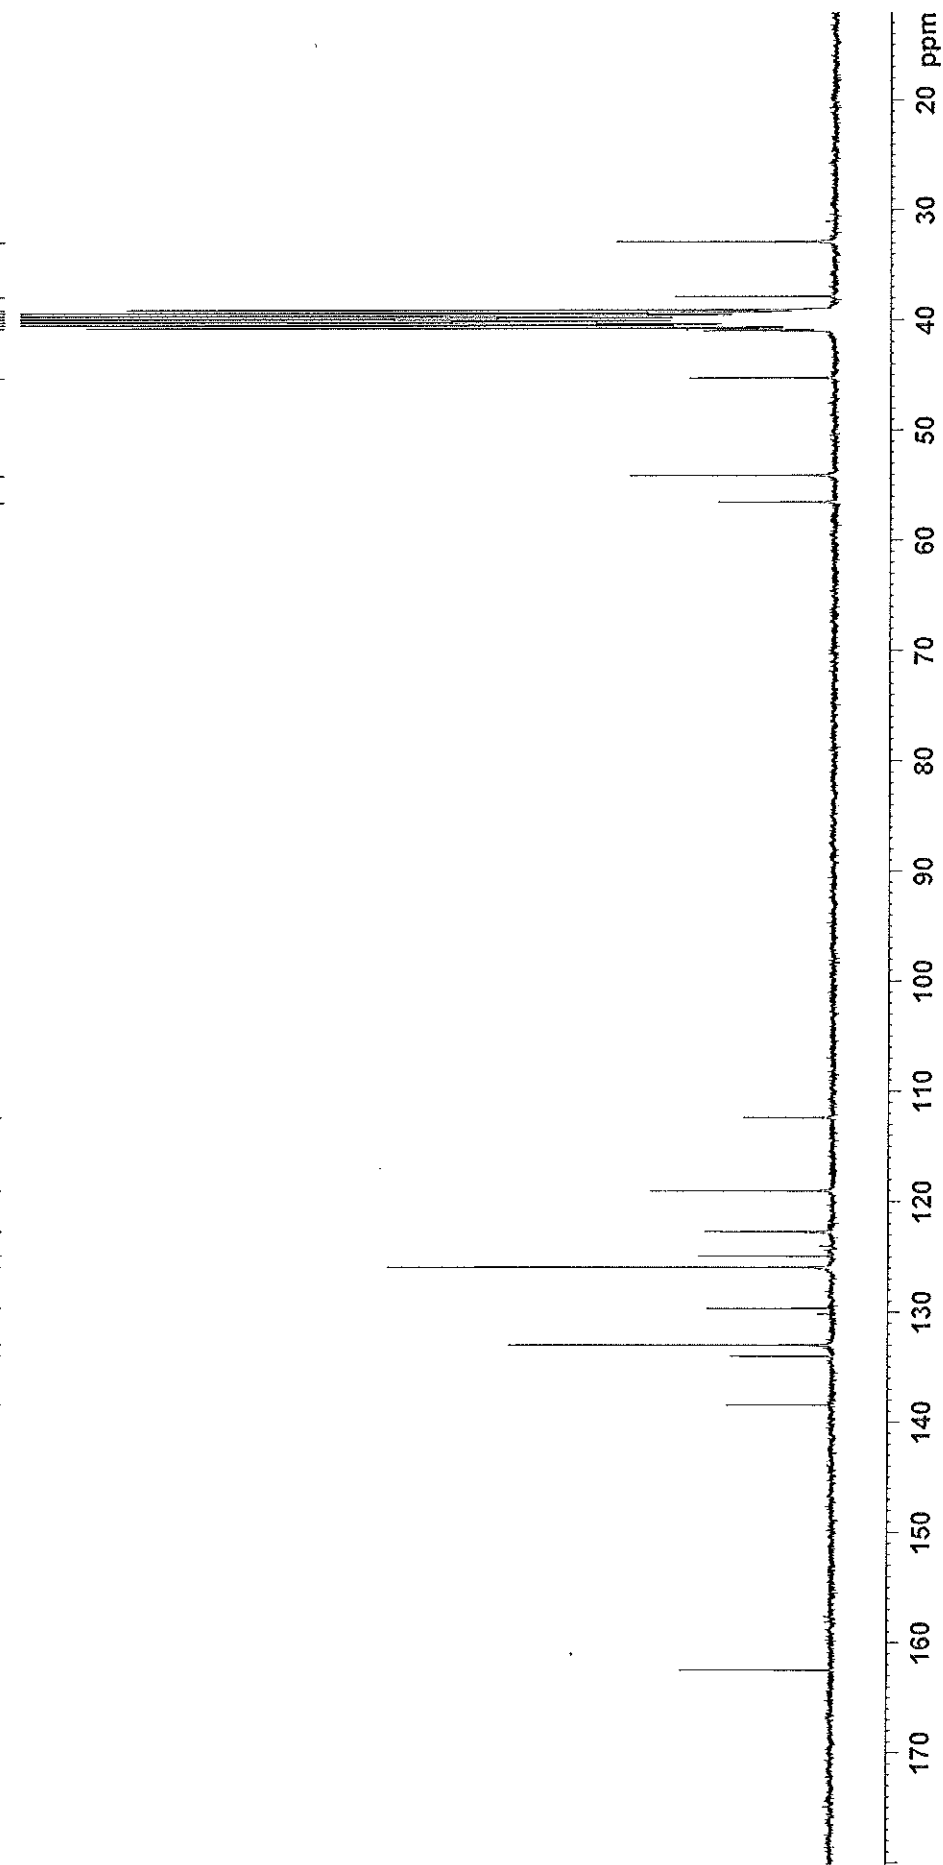

Analyst: Lakshmi Kumar.Tatini



SAMPLE INFORMATION

Sample Name: 0080/2246/117(1-Bromo imp) Pre-1 Instrument Method Id 2893  
Sample Type: Unknown Acquired By: Analyst  
Vial: 25 Date Acquired: 9/8/2009 2:24:33 PM IST  
Injection #: 1 Date Processed: 9/8/2009 5:05:41 PM IST  
Injection Volume: 10.00 ul Processing Method: 0080\_Stage123\_RS  
Sample Set Id 11609 Processing Method Id 11621  
Sample Set Name: 080909\_01 Proc. Chnl. Descr.: VWD AU On nm  
Project Name: Sertindole\_July\_09 System Name LL\_AD\_LC\_SYS012  
Result Id 11635 Result Set Id Software: Empower 2 Software Build 2154

Auto-Scaled Chromatogram

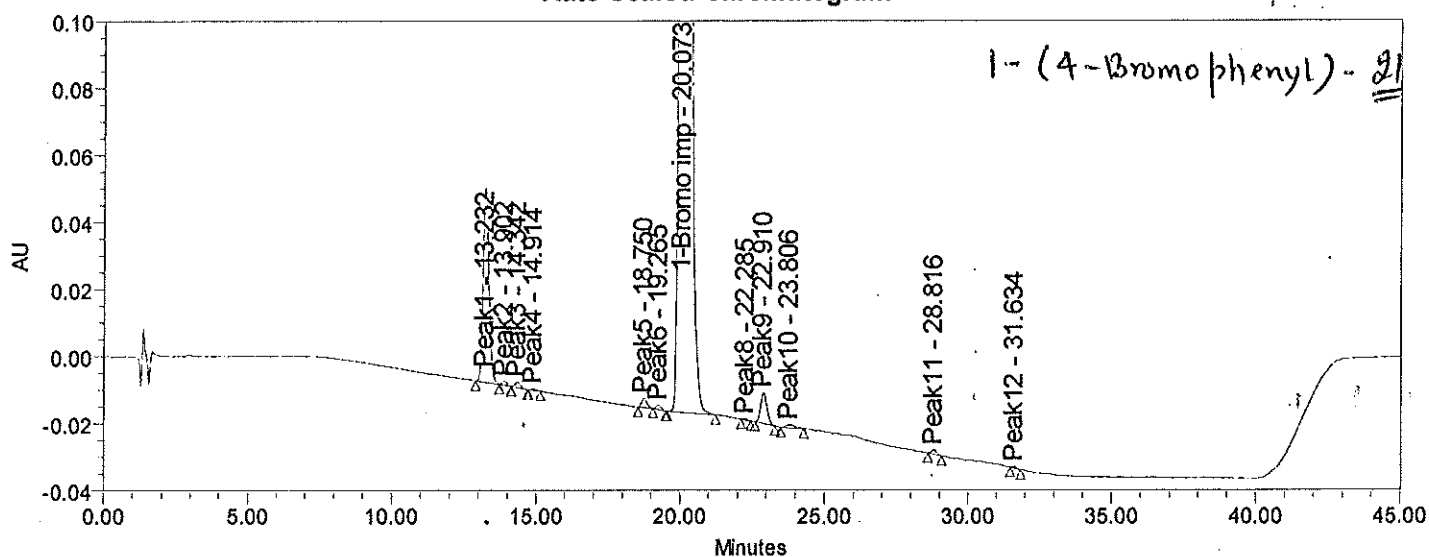

Peak Results

|    | Name        | RT    | Area<br>( $\mu V \cdot sec$ ) | % Area | RT Ratio | USP<br>Tailing | USP<br>Plate Count | USP Resolution |
|----|-------------|-------|-------------------------------|--------|----------|----------------|--------------------|----------------|
| 1  | Peak1       | 13.23 | 805021.53                     | 2.83   | 0.659    | 1.23           | 21240              |                |
| 2  | Peak2       | 13.90 | 12461.86                      | 0.04   | 0.693    | 1.15           | 34128              | 1.95           |
| 3  | Peak3       | 14.34 | 20947.52                      | 0.07   | 0.714    | 1.45           | 28039              | 1.32           |
| 4  | Peak4       | 14.91 | 4943.95                       | 0.02   | 0.743    | 1.39           | 42461              | 1.77           |
| 5  | Peak5       | 18.75 | 36363.78                      | 0.13   | 0.934    | 1.24           | 44034              | 11.81          |
| 6  | Peak6       | 19.27 | 14998.50                      | 0.05   | 0.960    | 1.23           | 54606              | 1.50           |
| 7  | 1-Bromo imp | 20.07 | 27356173.03                   | 96.19  | 1.000    | 1.39           | 32044              | 2.06           |
| 8  | Peak8       | 22.29 | 3448.03                       | 0.01   | 1.110    | 1.00           | 82094              | 5.82           |
| 9  | Peak9       | 22.91 | 138750.59                     | 0.49   | 1.141    | 1.17           | 51773              | 1.74           |
| 10 | Peak10      | 23.81 | 22591.38                      | 0.08   | 1.186    | 1.40           | 26437              | 1.64           |
| 11 | Peak11      | 28.82 | 17632.31                      | 0.06   | 1.436    | 1.10           | 112881             | 9.62           |
| 12 | Peak12      | 31.63 | 5890.80                       | 0.02   | 1.576    | 1.18           | 205970             | 8.69           |

<sup>1</sup>H NMR of 0080/2198/177 in DMSO-d<sub>6</sub>

Date:- 05/08/09 ARNO : SE0809/05

{C:/LKT/Structure elucidation/Aug-2009/16/1

5-Bromo

27

7.828  
7.822  
7.596  
7.580  
7.566  
7.550  
7.447  
7.407  
7.399  
7.377  
7.370  
7.340  
7.276  
7.270  
7.247  
7.240  
6.206

3.394  
3.369  
3.361  
3.341  
3.304  
3.208  
3.180  
3.158  
3.136  
2.988  
2.951  
2.813  
2.774  
2.745  
2.735  
2.479  
2.473  
2.467  
2.426  
2.404  
2.382  
2.121  
2.084  
2.057  
1.945  
1.908  
1.713  
1.682  
1.673  
1.642  
1.633  
1.602

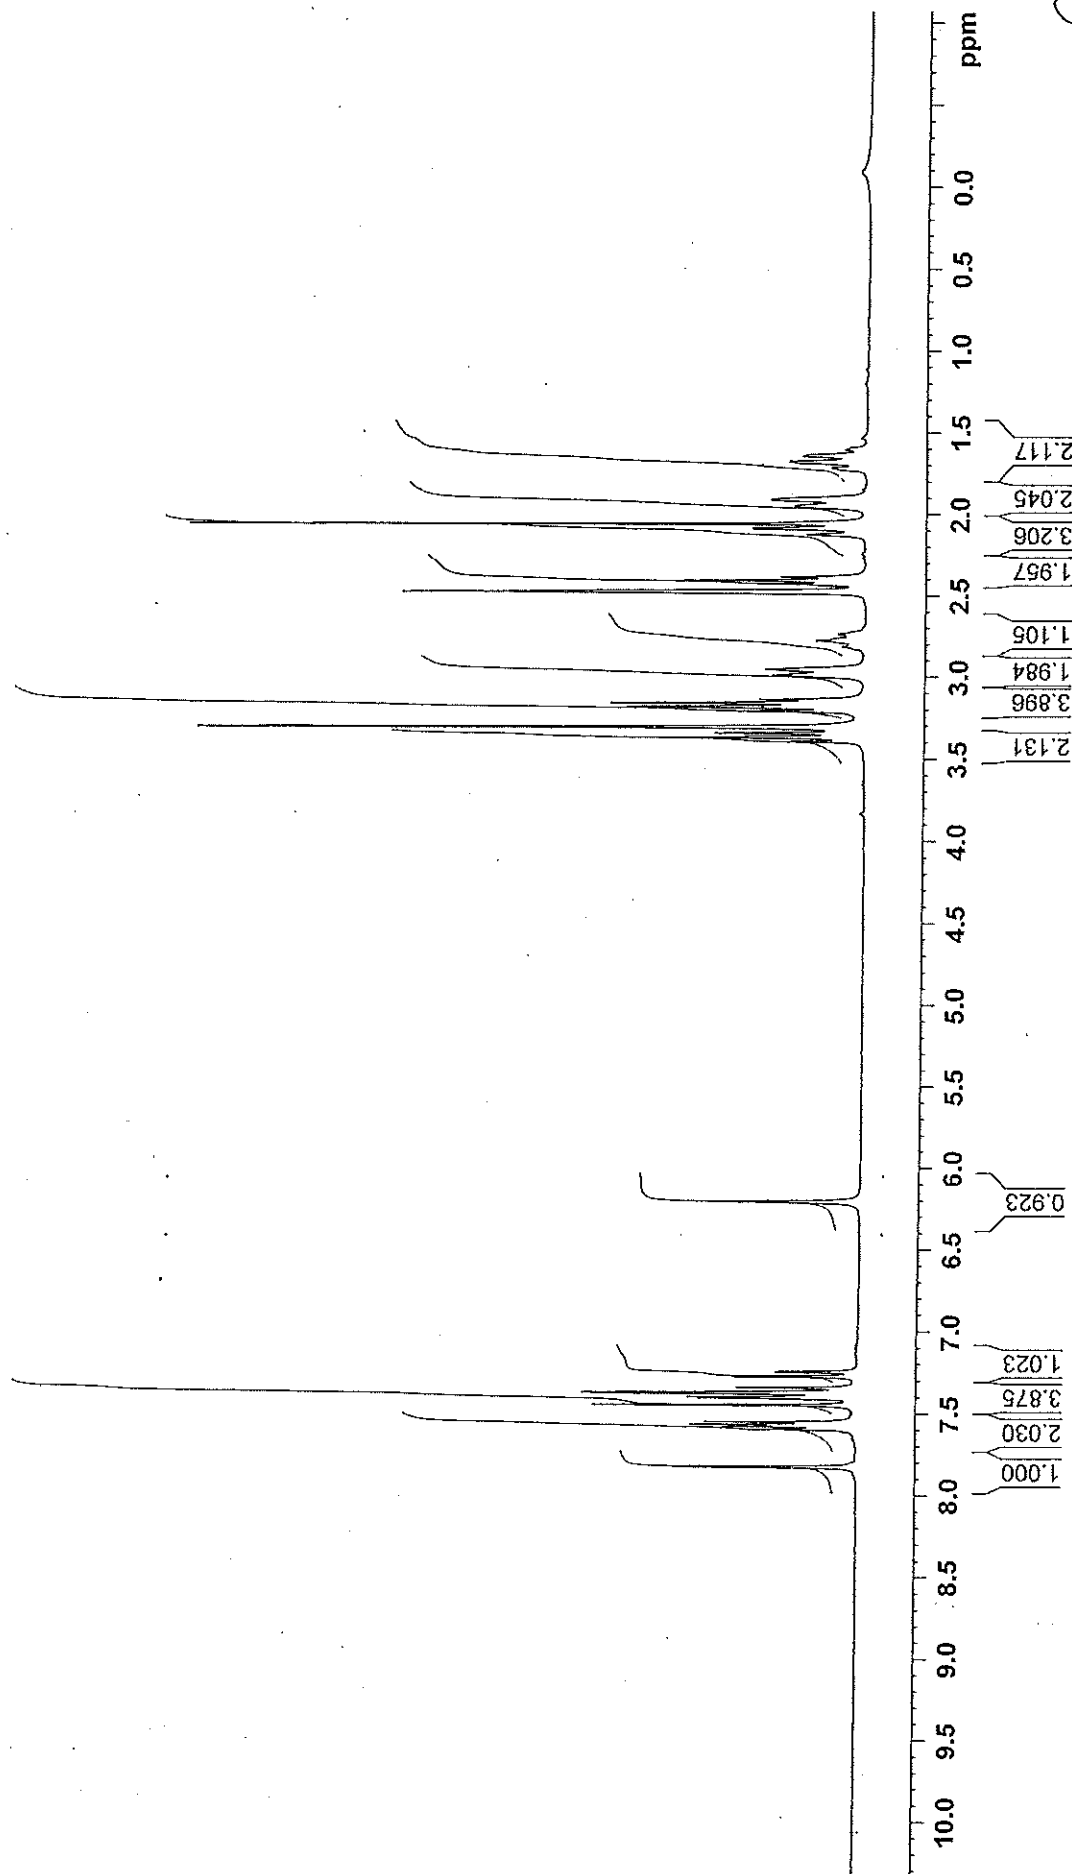

Analyst: Suresh Kumar.K

05/08/09

13C NMR of 0080/2198/177 in DMSO-d6  
Date:- 05/08/09 ARNO :SE0809/05  
{C:/LKT/Structure elucidation/Aug-2009/19/1}

5-bromo 27

aptut laurus

162.51  
162.26  
159.04  
  
135.51  
135.48  
134.65  
129.97  
126.32  
126.21  
126.15  
125.15  
122.06  
121.91  
117.05  
116.75  
112.67  
112.60

56.52  
54.10  
  
45.25  
40.98  
40.74  
40.46  
40.19  
39.91  
39.63  
39.35  
39.07  
37.85  
32.92

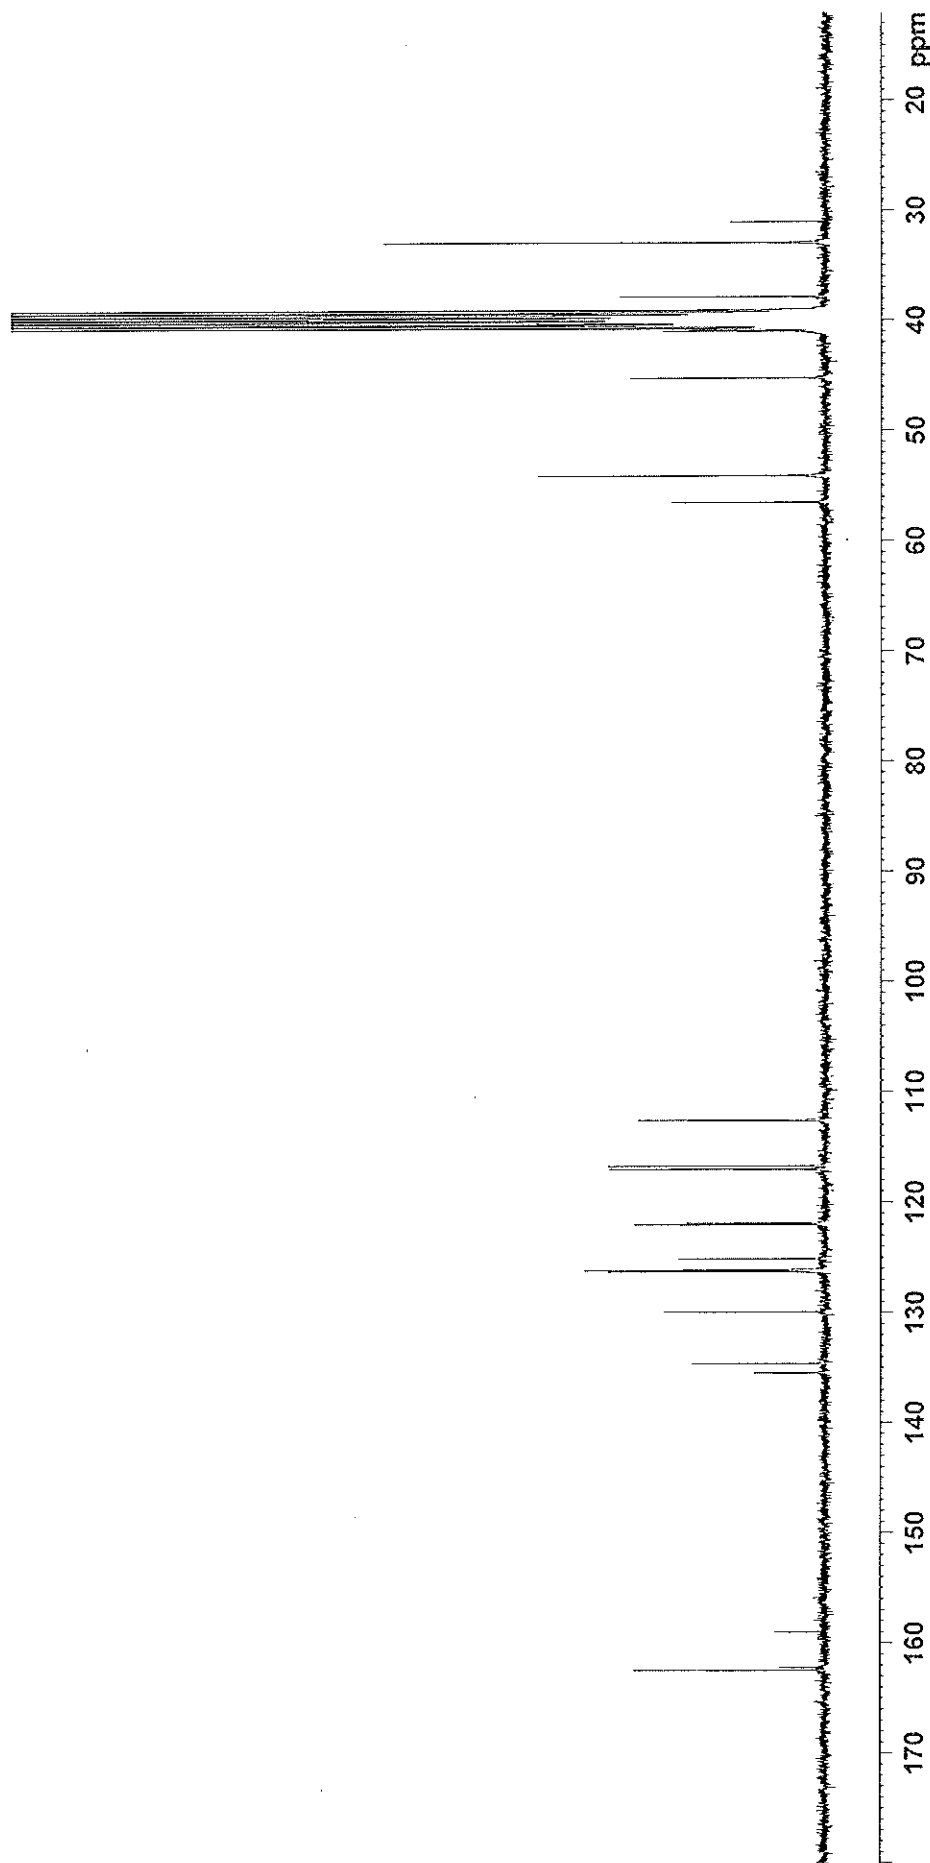

Analyst: Lakshmi Kumar.Tatini

## SAMPLE INFORMATION

Sample Name: 0080/2198/177(5-Bromo)Pre-1  
 Sample Type: Unknown  
 Vial: 57  
 Injection #: 1  
 Injection Volume: 10.00 ul  
 Sample Set Id 6733  
 Sample Set Name: 040809\_01  
 Project Name: Sertindole\_July\_09  
 Result Id 6994 Result Set Id

Instrument Method Id 6729

Acquired By: Analyst  
 Date Acquired: 8/5/2009 9:00:15 AM IST  
 Date Processed: 8/5/2009 11:52:43 AM IST  
 Processing Method: 0080\_Stage123\_RS  
 Processing Method Id 6978  
 Proc. Chnl. Descr.:  
 System Name LL\_AD\_LC\_SYS006  
 Software: Empower 2: Software Build 2154

## Auto-Scaled Chromatogram

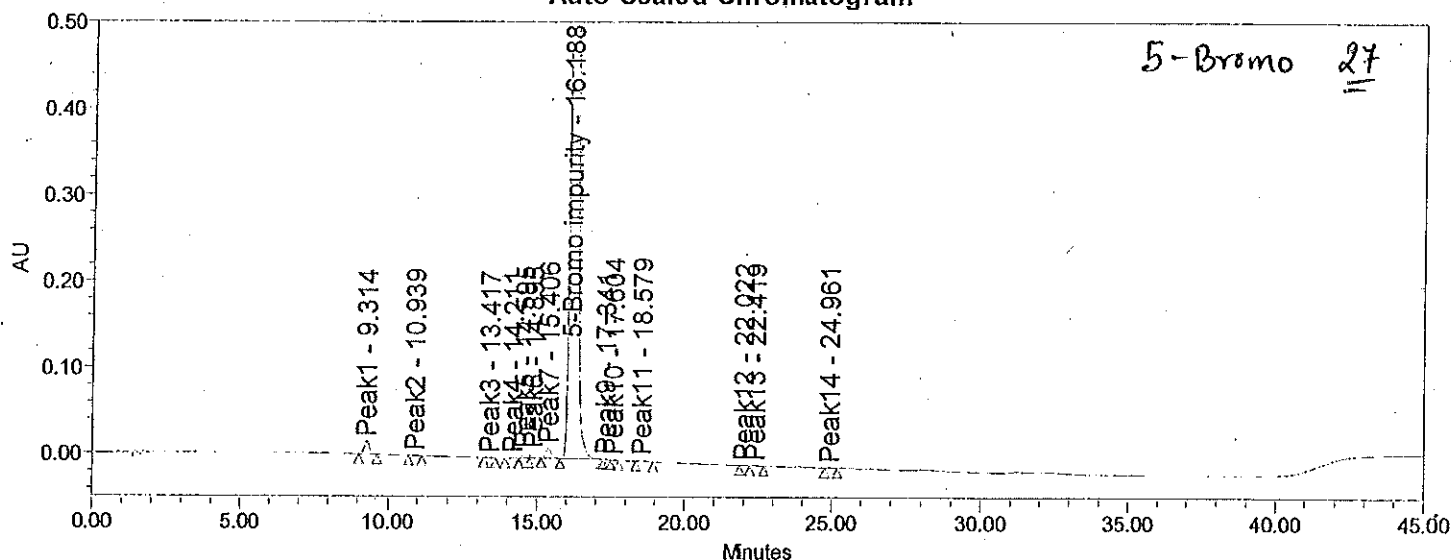

## Peak Results

|    | Name             | RT    | Area<br>( $\mu\text{V}\cdot\text{sec}$ ) | % Area | RT Ratio | USP<br>Resolution | USP<br>Tailing | USP<br>Plate Count |
|----|------------------|-------|------------------------------------------|--------|----------|-------------------|----------------|--------------------|
| 1  | Peak1            | 9.31  | 169853.55                                | 0.82   | 0.58     |                   | 1.11           | 15386              |
| 2  | Peak2            | 10.94 | 6288.65                                  | 0.03   | 0.68     | 5.10              | 1.36           | 18075              |
| 3  | Peak3            | 13.42 | 1289.42                                  | 0.01   | 0.83     | 7.63              | 0.93           | 29975              |
| 4  | Peak4            | 14.21 | 9390.67                                  | 0.05   | 0.88     | 2.58              | 0.94           | 37378              |
| 5  | Peak5            | 14.60 | 68669.33                                 | 0.33   | 0.90     |                   |                | 25965              |
| 6  | Peak6            | 14.89 | 71981.76                                 | 0.35   | 0.92     |                   |                | 19277              |
| 7  | Peak7            | 15.41 | 140468.91                                | 0.68   | 0.95     |                   | 1.34           | 39381              |
| 8  | 5-Bromo impurity | 16.19 | 20124412.85                              | 97.52  | 1.00     | 2.29              | 1.25           | 32573              |
| 9  | Peak9            | 17.34 | 2364.73                                  | 0.01   | 1.07     | 4.03              | 1.26           | 103152             |
| 10 | Peak10           | 17.60 | 2355.05                                  | 0.01   | 1.09     | 1.15              | 1.24           | 76840              |
| 11 | Peak11           | 18.58 | 25197.58                                 | 0.12   | 1.15     | 3.09              | 1.44           | 40669              |
| 12 | Peak12           | 22.02 | 3613.92                                  | 0.02   | 1.36     | 10.36             | 1.18           | 96388              |
| 13 | Peak13           | 22.42 | 6470.13                                  | 0.03   | 1.38     | 1.27              | 1.36           | 68778              |
| 14 | Peak14           | 24.96 | 3719.33                                  | 0.02   | 1.54     | 7.97              | 1.33           | 114360             |

SampleName 0080/2198/177(5-Bromo)Pre-1

Date Acquired 8/5/2009 9:00:15 AM IST

Signature / Date: *[Signature]*  
05/03/09

Page: 1 of 1

<sup>1</sup>H NMR of 0080/2154/200 in DMSO-d6  
 Date:- 29/07/09 ARNo : SE0709/022  
 {C:/IKT/Structure elucidation/July2009/54/1

Bis-alkylated 28

7.796  
7.790  
7.645  
7.622  
7.606  
7.599  
7.592  
7.576  
7.485  
7.455  
7.440  
7.411  
7.382  
7.207  
7.201  
7.178  
7.171  
6.633  
6.619

3.764  
3.723  
3.671  
3.650  
3.575  
3.487  
3.461  
3.435  
3.408  
3.307  
3.267  
3.258  
3.231  
3.207  
3.147  
3.130  
2.479  
2.474  
2.468  
2.176  
2.156

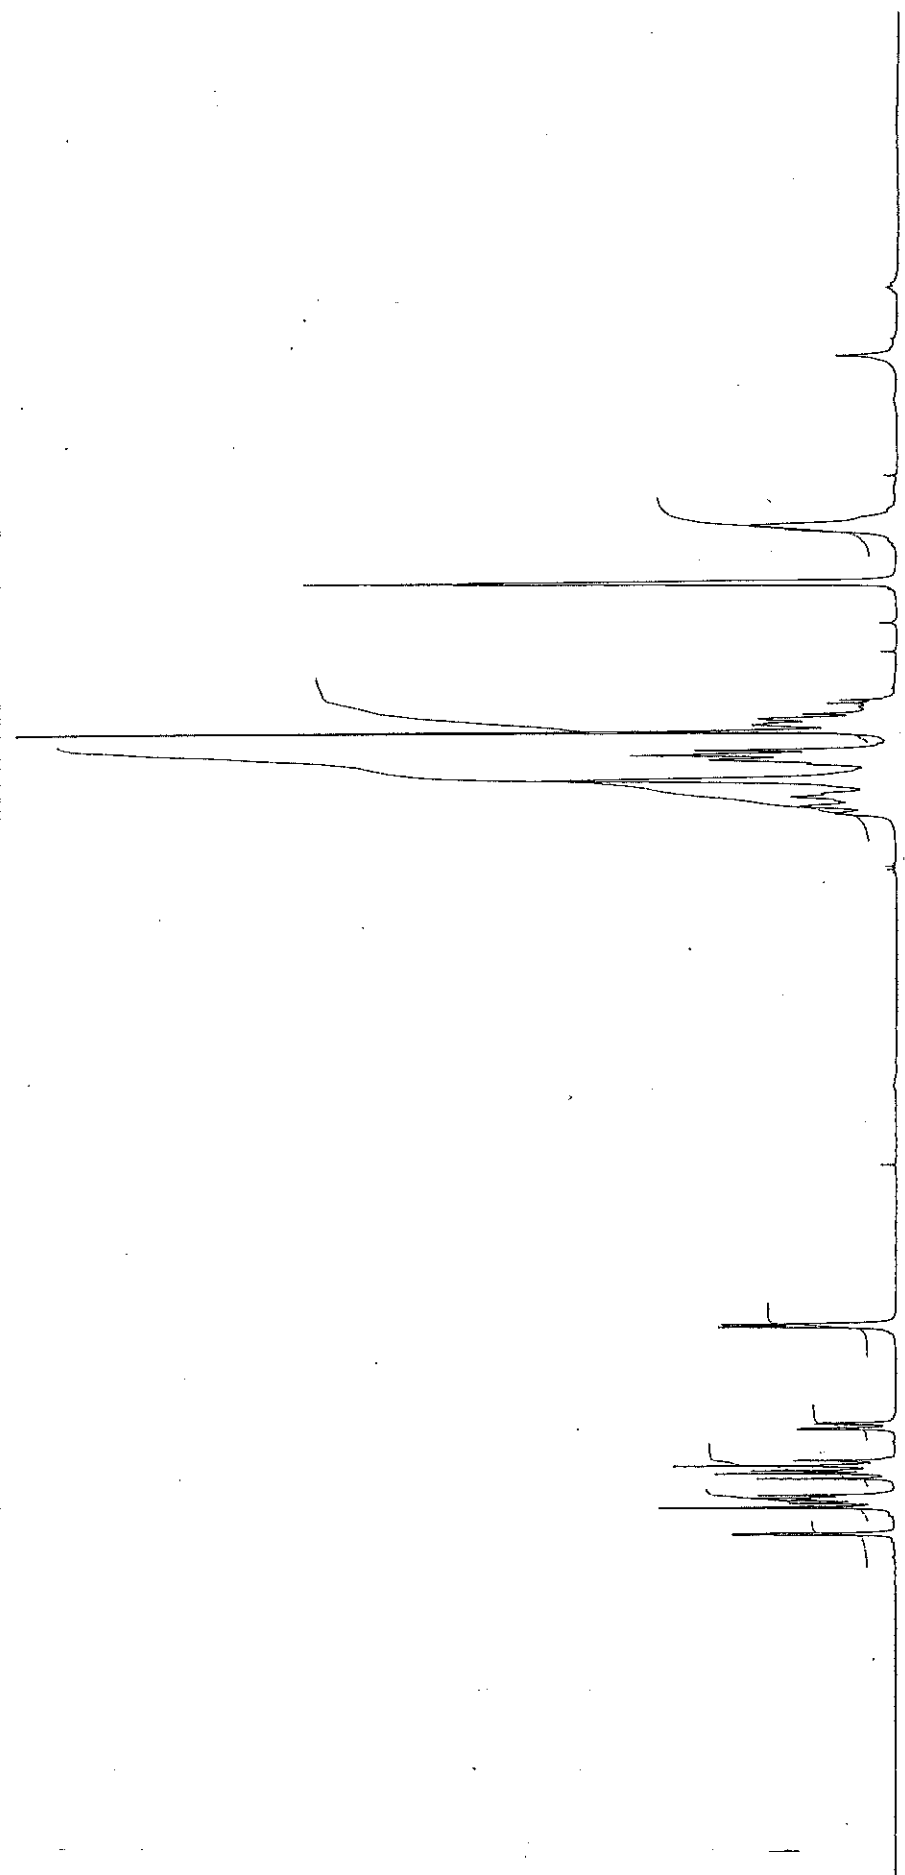

9.5 9.0 8.5 8.0 7.5 7.0 6.5 6.0 5.5 5.0 4.5 4.0 3.5 3.0 2.5 2.0 1.5 1.0 0.5 0.0 ppm

Analyst: Suresh Kumar.K  
 29/07/09

<sup>13</sup>C NMR of 0080/2154/200 in DMSO-d6  
 Date:- 29/07/09 ARNo :SE0709/022  
 {C:/IKT/Structure elucidation/July2009/57/1}

Bis-alkylated 28  
 aptuit laurus

162.51  
 162.38  
 159.16  
 135.42  
 135.39  
 134.30  
 129.04  
 127.19  
 126.36  
 126.25  
 125.03  
 122.91  
 119.38  
 118.84  
 117.18  
 116.88  
 112.38

59.69  
 45.75  
 45.43  
 40.74  
 40.46  
 40.19  
 39.91  
 39.63  
 39.35  
 39.07  
 37.84  
 37.71  
 29.91  
 26.19

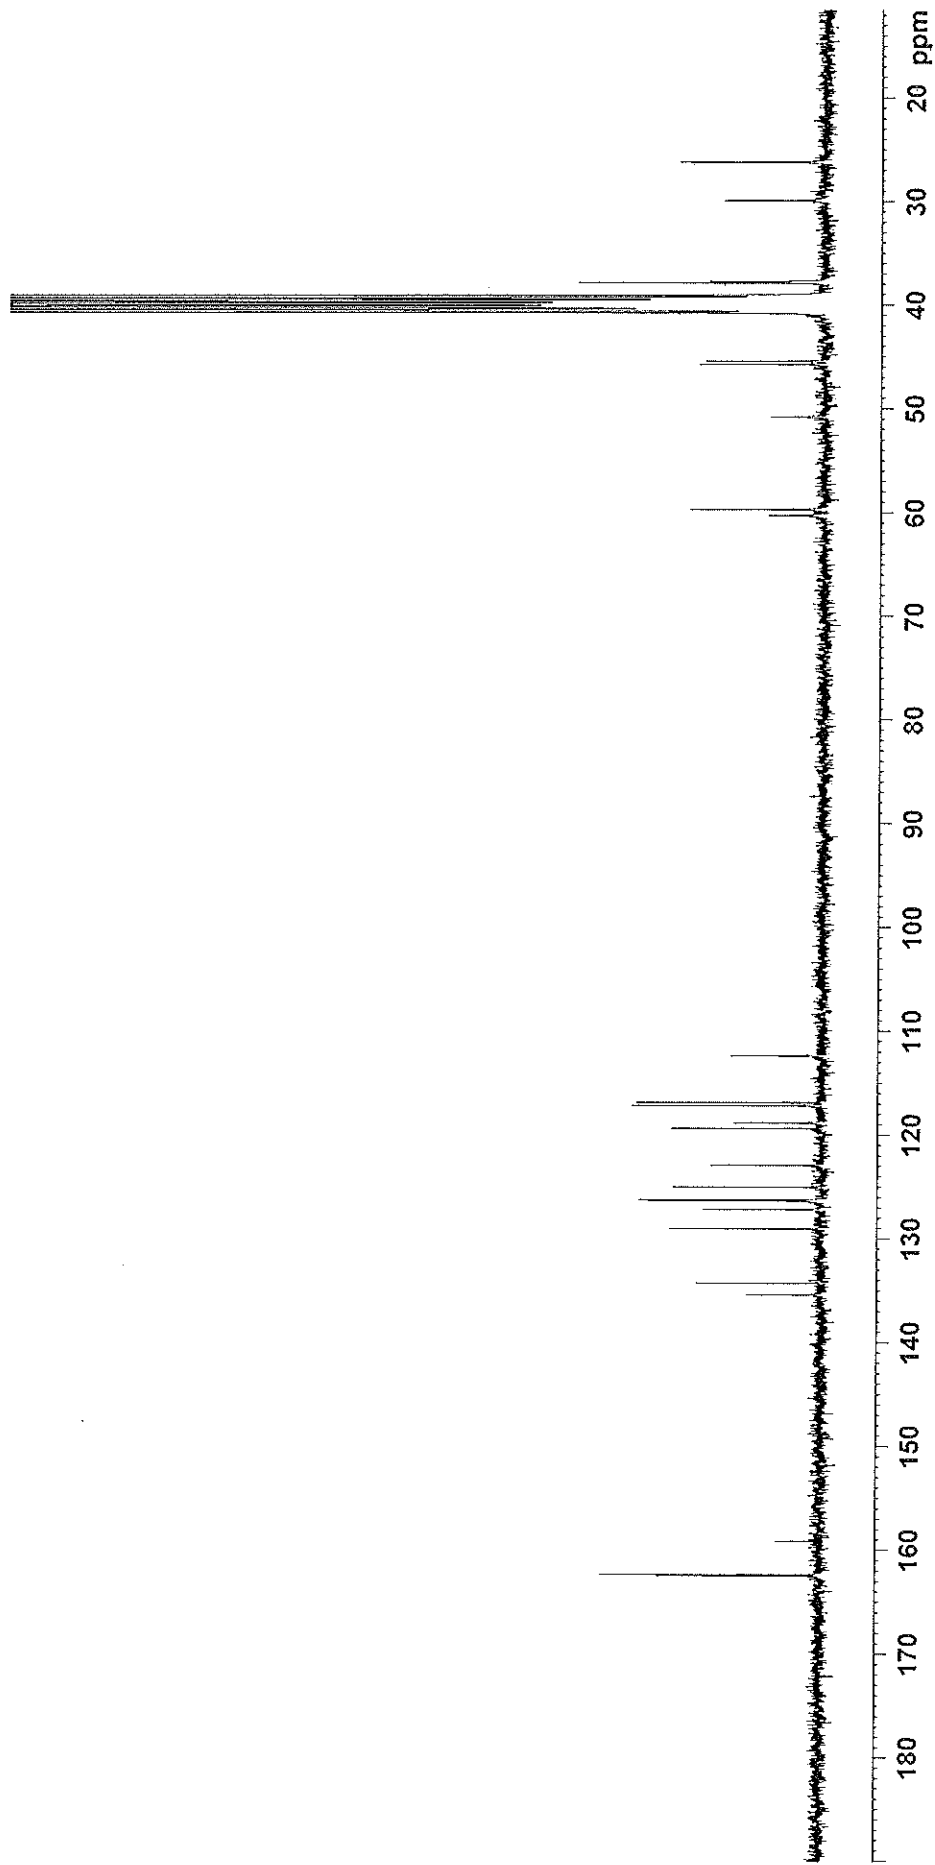

Analyst: Lakshmi Kumar.Tatini

## SAMPLE INFORMATION

Sample Name: 0080/2154/200(dimer) pre-1  
 Sample Type: Unknown  
 Vial: 62  
 Injection #: 1  
 Injection Volume: 10.00 ul  
 Sample Set Id 5596  
 Sample Set Name: 300709 01  
 Project Name: Sertindole\_July\_09  
 Result Id 5791 Result Set Id

Instrument Method Id 4820

Acquired By: Analyst  
 Date Acquired: 7/31/2009 5:41:41 AM IST  
 Date Processed: 7/31/2009 10:00:23 AM IST  
 Processing Method: 0080\_RS  
 Processing Method Id 5767  
 Proc. Chnl. Descr.: VWD AU On nm  
 System Name LL\_AD\_LC\_SYS011  
 Software: Empower 2 Software Build 2154

## Auto-Scaled Chromatogram

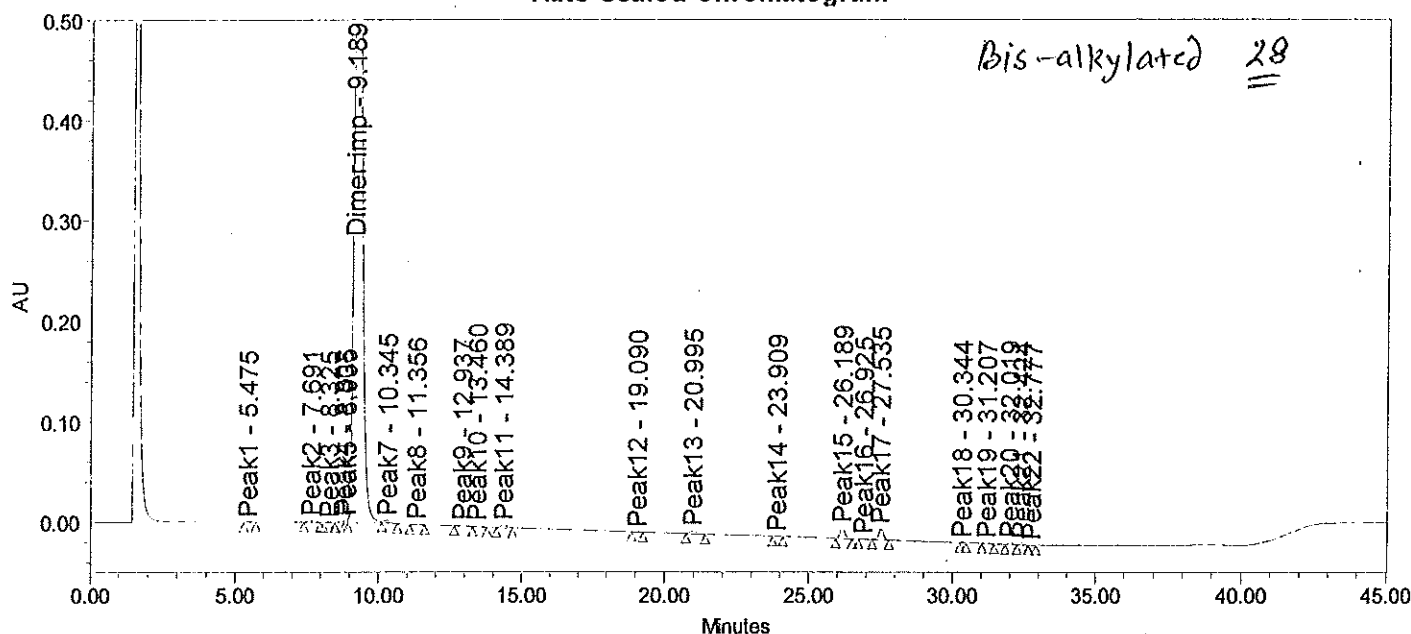

## Peak Results

|    | Name      | RT    | Area<br>( $\mu$ V $\cdot$ sec) | % Area | RT Ratio | USP<br>Resolution | USP<br>Tailing | USP<br>Plate Count |
|----|-----------|-------|--------------------------------|--------|----------|-------------------|----------------|--------------------|
| 1  | Peak1     | 5.47  | 2896.68                        | 0.02   | 0.60     |                   | 1.23           | 3663               |
| 2  | Peak2     | 7.69  | 14796.54                       | 0.10   | 0.84     | 5.94              | 1.10           | 7305               |
| 3  | Peak3     | 8.33  | 2672.10                        | 0.02   | 0.91     | 1.83              | 0.84           | 10900              |
| 4  | Peak4     | 8.81  | 9477.23                        | 0.06   | 0.96     |                   |                |                    |
| 5  | Peak5     | 8.94  | 14247.40                       | 0.10   | 0.97     |                   |                |                    |
| 6  | Dimer imp | 9.19  | 14262222.61                    | 96.67  | 1.00     |                   | 1.90           | 6663               |
| 7  | Peak7     | 10.35 | 32588.51                       | 0.22   | 1.13     | 2.81              | 1.28           | 13121              |
| 8  | Peak8     | 11.36 | 7449.18                        | 0.05   | 1.24     | 2.80              | 0.93           | 13919              |
| 9  | Peak9     | 12.94 | 19684.40                       | 0.13   | 1.41     | 3.63              | 1.19           | 9482               |
| 10 | Peak10    | 13.46 | 12459.01                       | 0.08   | 1.46     | 1.17              | 1.46           | 22709              |
| 11 | Peak11    | 14.39 | 33203.96                       | 0.23   | 1.57     | 2.55              | 1.10           | 29855              |
| 12 | Peak12    | 19.09 | 1939.73                        | 0.01   | 2.08     | 13.90             | 0.84           | 63712              |

SampleName 0080/2154/200(dimer) pre-1

Date Acquired 7/31/2009 5:41:41 AM IST

Signature / Date: VGO  
31/07/09

Page: 1 of 2

<sup>1</sup>H NMR of 0080/2198/090 in DMSO-d<sub>6</sub>  
 Date:- 29/07/09 ARNO :SE0709/023  
 {C:/LKT/Structure elucidation/July2009/51/1

N-wide 29

7.773  
 7.766  
 7.609  
 7.593  
 7.586  
 7.579  
 7.563  
 7.529  
 7.458  
 7.428  
 7.404  
 7.375  
 7.346  
 7.179  
 7.173  
 7.150  
 7.143  
 6.462

3.626  
 3.603  
 3.582  
 3.399  
 3.374  
 3.366  
 3.347  
 3.295  
 3.273  
 3.237  
 3.210  
 3.110  
 3.074  
 2.971  
 2.930  
 2.889  
 2.860  
 2.537  
 2.513  
 2.486  
 2.480  
 2.474  
 2.467  
 2.462  
 2.419  
 1.808  
 1.766

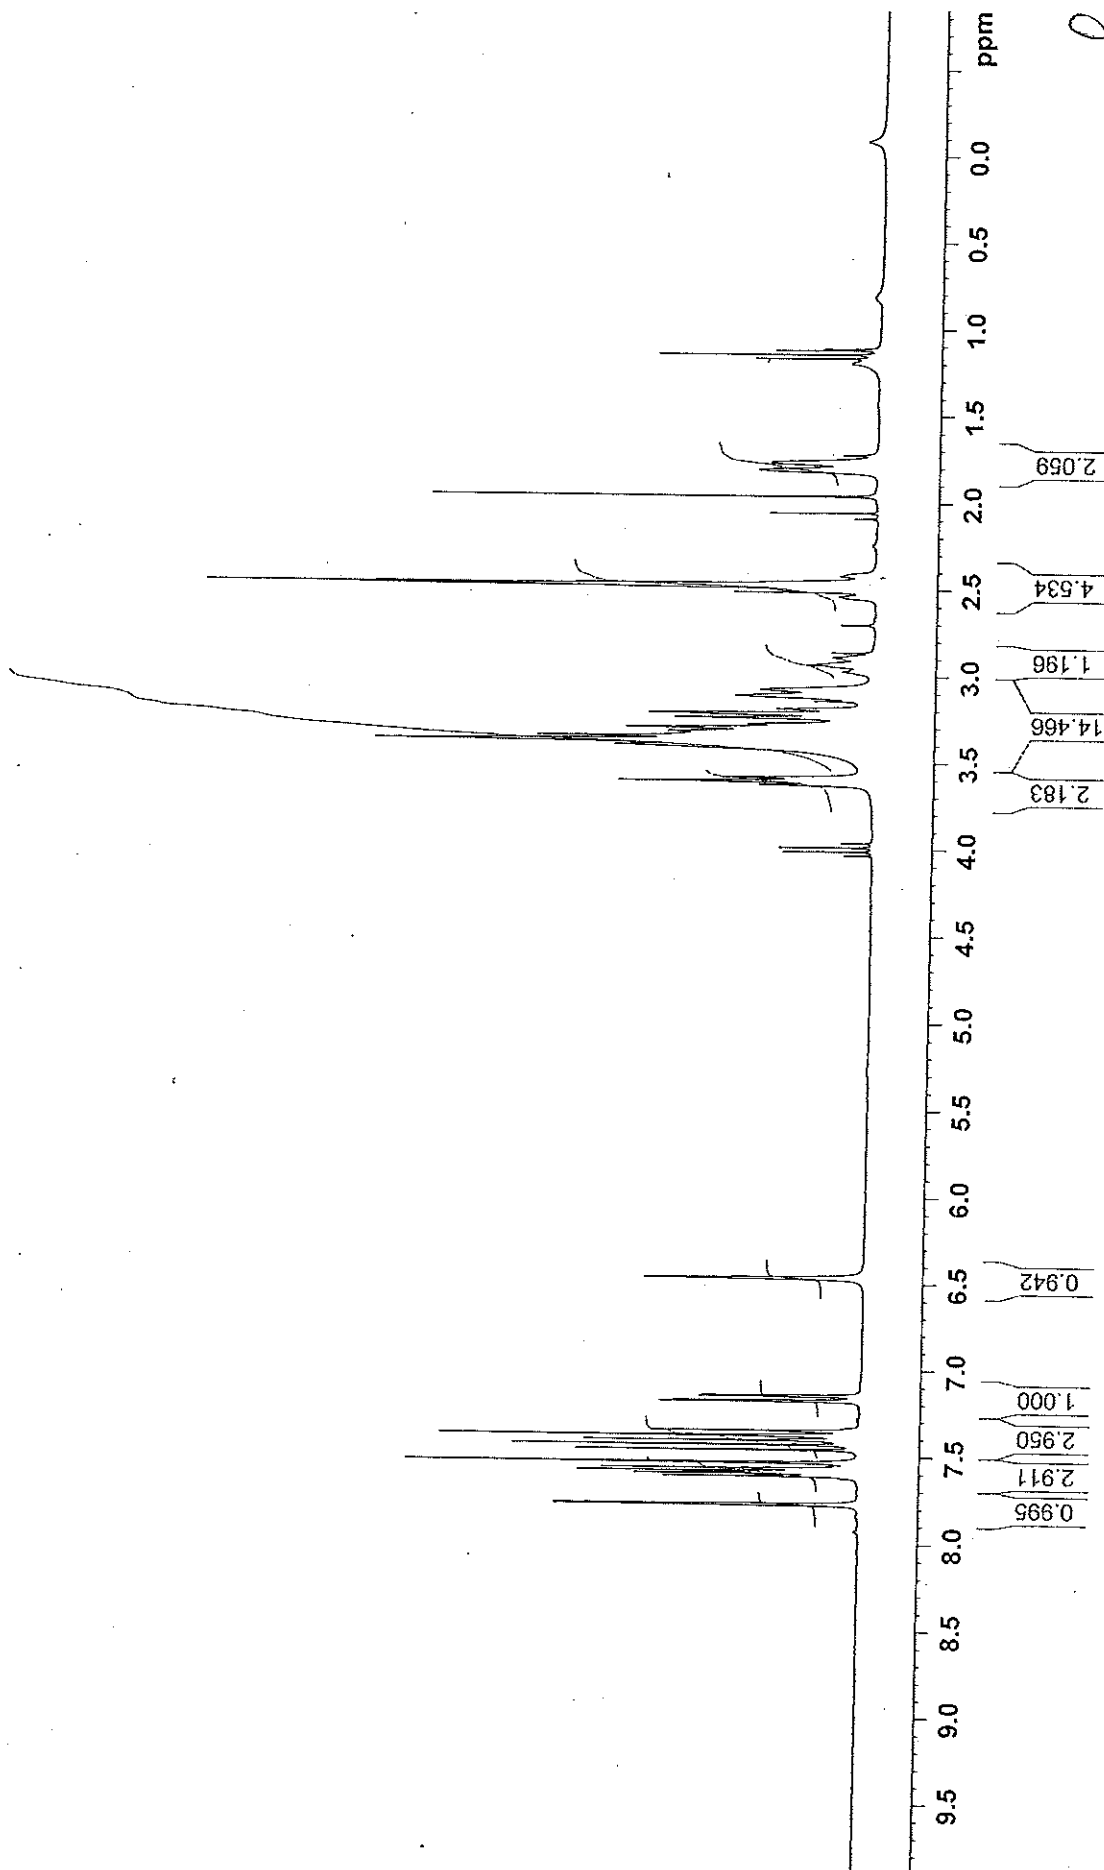

Analyst: Suresh Kumar.K



<sup>13</sup>C NMR of 0080/2198/090 in DMSO-d<sub>6</sub>  
 Date:- 30/07/09 ARNo : SE0709/023  
 {C:/LKT/Structure elucidation/July2009/58/1}

aptul laurus

*N-oxide* 29

159.08  
 162.31  
 162.54  
 135.46  
 135.42  
 134.54  
 129.11  
 126.50  
 126.39  
 126.27  
 124.76  
 122.69  
 121.00  
 119.01  
 117.06  
 116.76  
 112.34

67.86  
 64.34

45.42  
 40.74  
 40.46  
 40.18  
 39.90  
 39.62  
 39.35  
 39.07  
 37.95  
 37.86  
 31.15  
 27.06

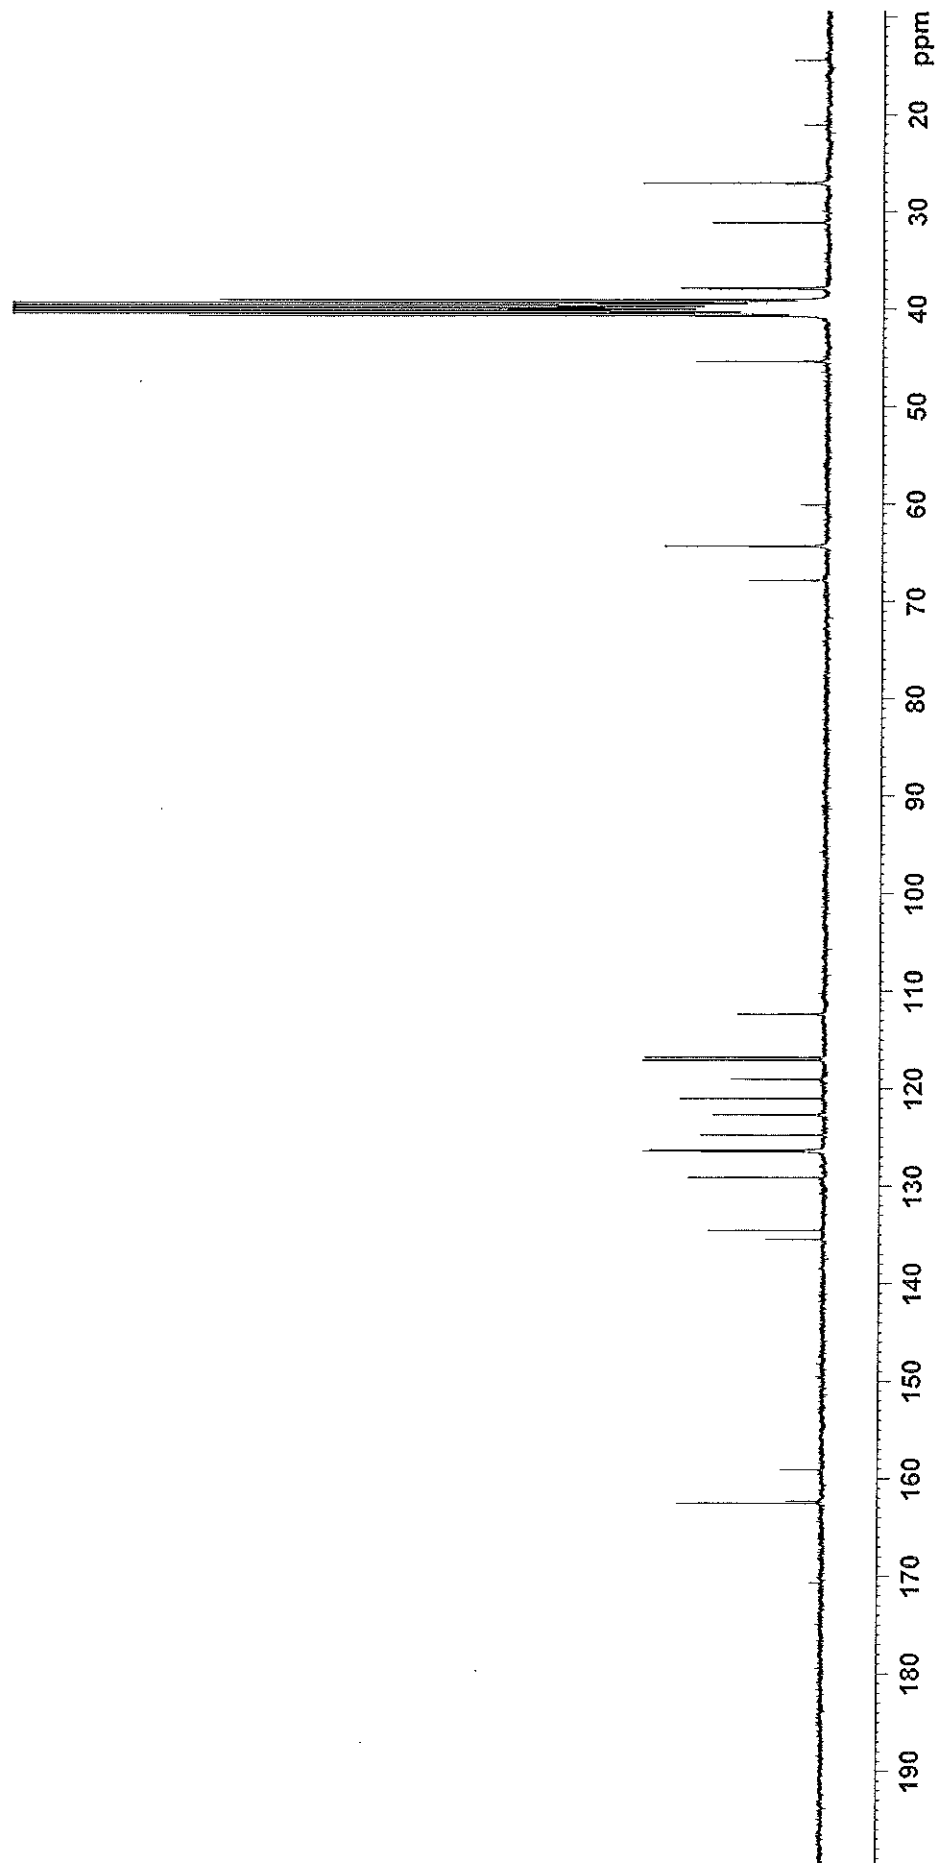

Analyst: Lakshmi Kumar.Tatini

## SAMPLE INFORMATION

Sample Name: 0080/2198/090(N-Oxide)pre-1  
Sample Type: Unknown  
Vial: 60  
Injection #: 1  
Injection Volume: 10.00 ul  
Sample Set Id 5596  
Sample Set Name: 300709 01  
Project Name: Sertindole\_July\_09  
Result Id 5762 Result Set Id

Instrument Method Id 4820  
Acquired By: Analyst  
Date Acquired: 7/31/2009 4:07:35 AM IST  
Date Processed: 7/31/2009 9:53:06 AM IST  
Processing Method: 0080\_RS  
Processing Method Id 5748  
Proc. Chnl. Descr.: VWD AU On nm  
System Name LL\_AD\_LC\_SYS011  
Software: Empower 2 Software Build 2154

## Auto-Scaled Chromatogram

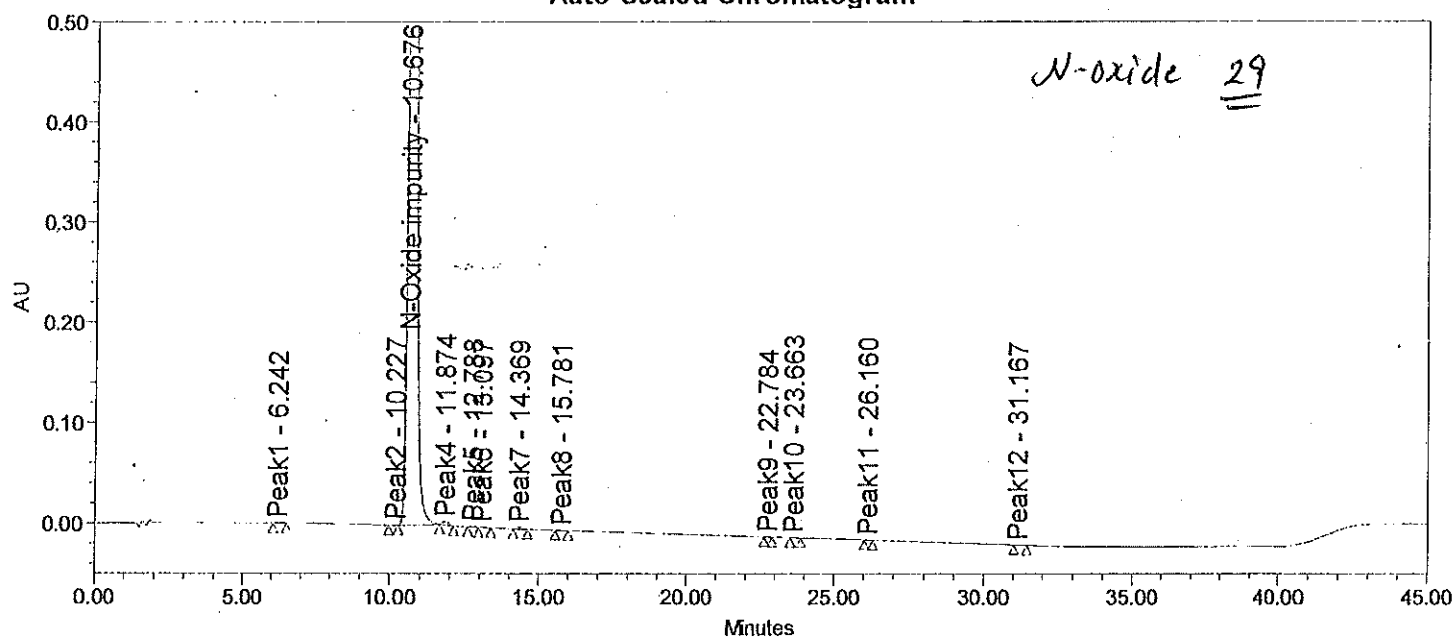

## Peak Results

|    | Name             | RT    | Area<br>( $\mu\text{V}\cdot\text{sec}$ ) | % Area | RT Ratio | USP<br>Resolution | USP<br>Tailing | USP<br>Plate Count |
|----|------------------|-------|------------------------------------------|--------|----------|-------------------|----------------|--------------------|
| 1  | Peak1            | 6.24  | 3592.17                                  | 0.02   | 0.58     |                   | 1.09           | 4024               |
| 2  | Peak2            | 10.23 | 5303.52                                  | 0.02   | 0.96     |                   |                |                    |
| 3  | N-Oxide Impurity | 10.68 | 23008159.93                              | 99.51  | 1.00     |                   | 1.26           | 12833              |
| 4  | Peak4            | 11.87 | 44388.07                                 | 0.19   | 1.11     | 3.24              | 1.19           | 18072              |
| 5  | Peak5            | 12.79 | 14219.19                                 | 0.06   | 1.20     | 2.51              |                | 20467              |
| 6  | Peak6            | 13.10 | 8240.95                                  | 0.04   | 1.23     |                   |                |                    |
| 7  | Peak7            | 14.37 | 24744.88                                 | 0.11   | 1.35     |                   | 1.11           | 27527              |
| 8  | Peak8            | 15.78 | 3249.25                                  | 0.01   | 1.48     | 4.54              | 0.98           | 29353              |
| 9  | Peak9            | 22.78 | 1289.54                                  | 0.01   | 2.13     | 27.23             | 0.91           | 86436              |
| 10 | Peak10           | 23.66 | 3557.38                                  | 0.02   | 2.22     | 3.38              | 1.12           | 170517             |
| 11 | Peak11           | 26.16 | 1693.83                                  | 0.01   | 2.45     | 8.43              | 1.06           | 189542             |
| 12 | Peak12           | 31.17 | 3847.68                                  | 0.02   | 2.92     | 14.84             | 1.41           | 169601             |

SampleName 0080/2198/090(N-Oxide)pre-1

Date Acquired 7/31/2009 4:07:35 AM IST

Signature / Date:  3/6 7/09

Page: 1 of 1

## SAMPLE INFORMATION

|                   |                        |                      |                               |
|-------------------|------------------------|----------------------|-------------------------------|
| Sample Name:      | 0.1%(Solution)Accuracy | Instrument Method Id | 12617                         |
| Sample Type:      | Unknown                | Acquired By:         | Analyst                       |
| Vial:             | 60                     | Date Acquired:       | 9/17/2009 6:13:52 AM IST      |
| Injection #:      | 1                      | Date Processed:      | 9/17/2009 9:36:25 AM IST      |
| Injection Volume: | 10.00 ul               | Processing Method:   | 0080_Stage 4_RS               |
| Sample Set Id     | 12704                  | Processing Method Id | 12819                         |
| Sample Set Name:  | 160909_02              | Proc. Chnl. Descr.:  | VWD AU On nm                  |
| Project Name:     | Sertindole_July_09     | System Name          | LL_AD_LC_SYS011               |
| Result Id         | 12832                  | Result Set Id        |                               |
|                   |                        | Software:            | Empower 2 Software Build 2154 |

## Auto-Scaled Chromatogram

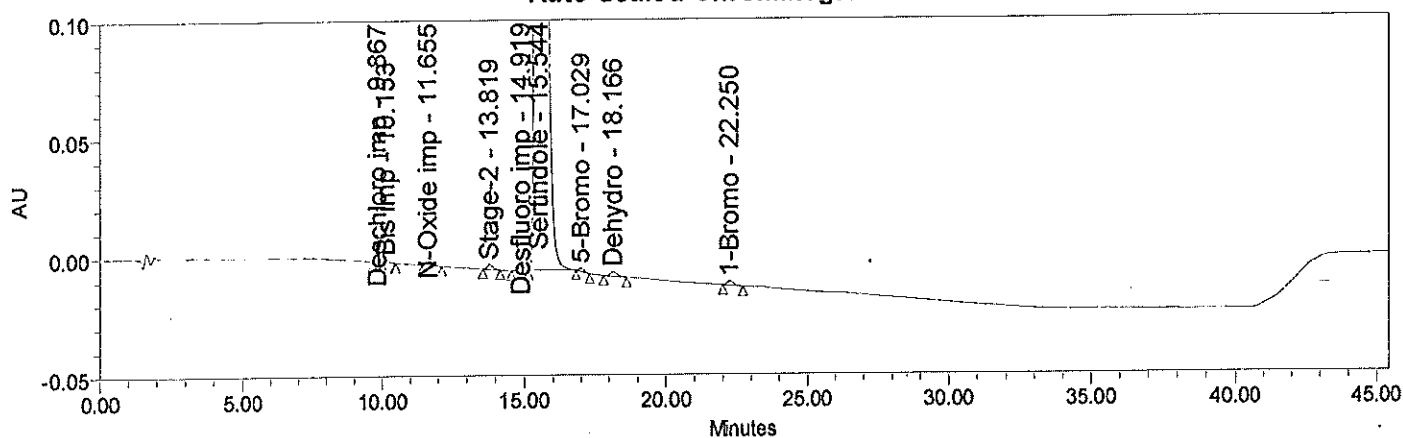

## Peak Results

|   | Name          | RT    | Area<br>( $\mu\text{V}\cdot\text{sec}$ ) | %Area | RT Ratio | USP Resolution | USP Tailing | USP Plate Count | s/n      |
|---|---------------|-------|------------------------------------------|-------|----------|----------------|-------------|-----------------|----------|
| 1 | Deschloro imp | 9.87  | 12966.78                                 | 0.05  | 0.63     |                |             |                 | 21.62    |
| 2 | Bis imp       | 10.15 | 14725.13                                 | 0.05  | 0.65     |                |             |                 | 21.67    |
| 3 | N-Oxide imp   | 11.66 | 22585.48                                 | 0.08  | 0.75     |                | 1.54        | 11568           | 31.81    |
| 4 | Stage-2       | 13.82 | 29223.62                                 | 0.11  | 0.89     | 5.12           | 1.26        | 20203           | 46.26    |
| 5 | Desfluoro imp | 14.92 | 32837.84                                 | 0.12  | 0.96     | 2.50           | 0.84        | 16831           | 45.99    |
| 6 | Sertindole    | 15.54 | 26807667.48                              | 99.30 |          | 1.31           | 1.40        | 17973           | 34756.09 |
| 7 | 5-Bromo       | 17.03 | 19482.56                                 | 0.07  | 1.10     | 3.48           | 1.31        | 32746           | 32.30    |
| 8 | Dehydro       | 18.17 | 30939.38                                 | 0.11  | 1.17     | 2.71           | 1.41        | 27197           | 42.44    |
| 9 | 1-Bromo       | 22.25 | 27398.08                                 | 0.10  | 1.43     | 9.17           | 1.39        | 44192           | 39.70    |

Base line noise : 0.044

## SAMPLE INFORMATION

Sample Name: 0080 sst solution  
Sample Type: Unknown  
Vial: 14  
Injection #: 1  
Injection Volume: 10.00 ul  
Sample Set Id 2253  
Sample Set Name: 241009\_01  
Project Name: Sertindole\_OCT\_09  
Result Id 2330 Result Set Id

Instrument Method Id 1302  
Acquired By: Analyst  
Date Acquired: 10/24/2009 1:37:43 PM IST  
Date Processed: 10/25/2009 9:03:50 AM IST  
Processing Method: 0080\_Stage4\_RS  
Processing Method Id 2319  
Proc. Chnl. Descr.: VWD AU On nm  
System Name LL\_AD\_LC\_SYS012  
Software: Empower 2 Software Build 2154

## Auto-Scaled Chromatogram

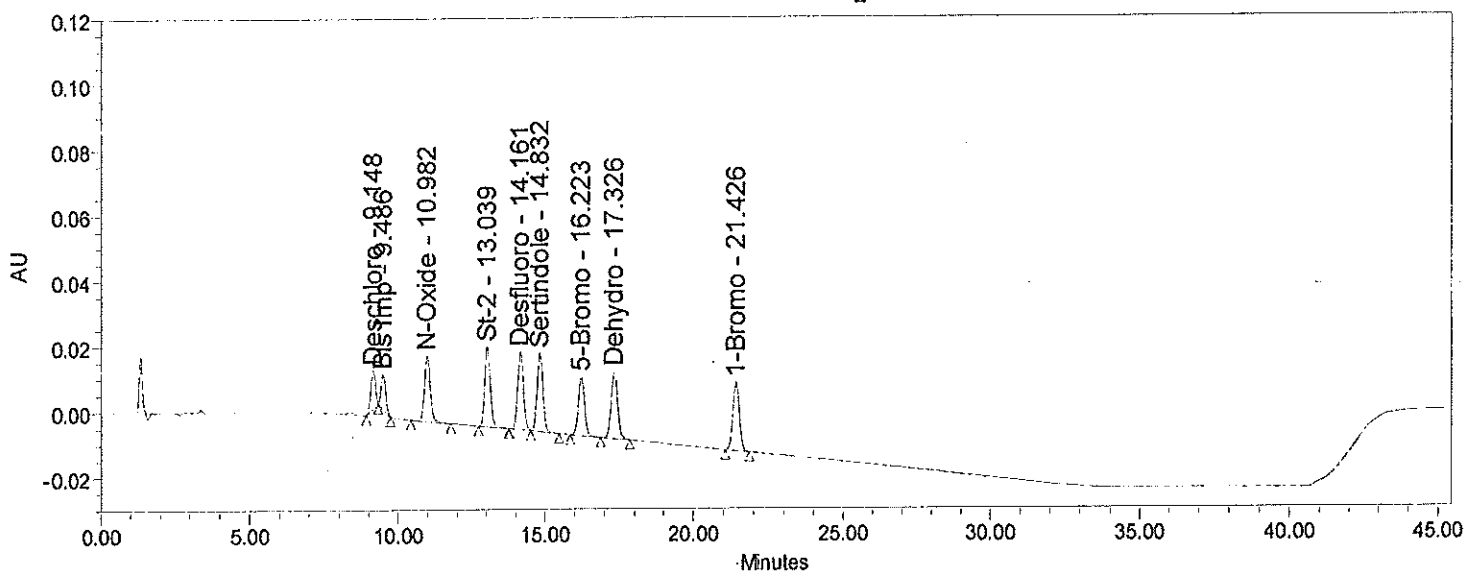

## Peak Results

|   | Name       | RT    | Area<br>( $\mu\text{V}\cdot\text{sec}$ ) | % Area | RT Ratio |
|---|------------|-------|------------------------------------------|--------|----------|
| 1 | Deschloro  | 9.15  | 126531.33                                | 5.32   | 0.62     |
| 2 | Bis Imp    | 9.49  | 118654.03                                | 4.99   | 0.64     |
| 3 | N-Oxide    | 10.98 | 279757.64                                | 11.77  | 0.74     |
| 4 | St-2       | 13.04 | 324819.57                                | 13.66  | 0.88     |
| 5 | Desfluoro  | 14.16 | 327803.19                                | 13.79  | 0.95     |
| 6 | Sertindole | 14.83 | 329496.88                                | 13.86  | 1.00     |
| 7 | 5-Bromo    | 16.22 | 255223.59                                | 10.73  | 1.09     |
| 8 | Dehydro    | 17.33 | 304297.36                                | 12.80  | 1.17     |
| 9 | 1-Bromo    | 21.43 | 310908.94                                | 13.08  | 1.44     |

# SAMPLE INFORMATION

Sample Name: 0080/st 4/1974/130  
Sample Type: Unknown  
Vial: 34  
Injection #: 1  
Injection Volume: 20.00 ul  
Sample Set Id 6145  
Sample Set Name: 120509\_01  
Project Name: Sertindole\_FD\_April\_09  
Result Id 6345 Result Set Id

Instrument Method Id 5847  
Acquired By: Analyst  
Date Acquired: 5/12/2009 3:07:37 PM IST  
Date Processed: 5/13/2009 10:49:32 AM IST  
Processing Method: 0080\_Stage4\_RS  
Processing Method Id 6318  
Proc. Chnl. Descr.: VWD AU On nm  
System Name LL\_AD\_LC\_SYS012  
Software: Empower 2 Software Build 2154

## Auto-Scaled Chromatogram

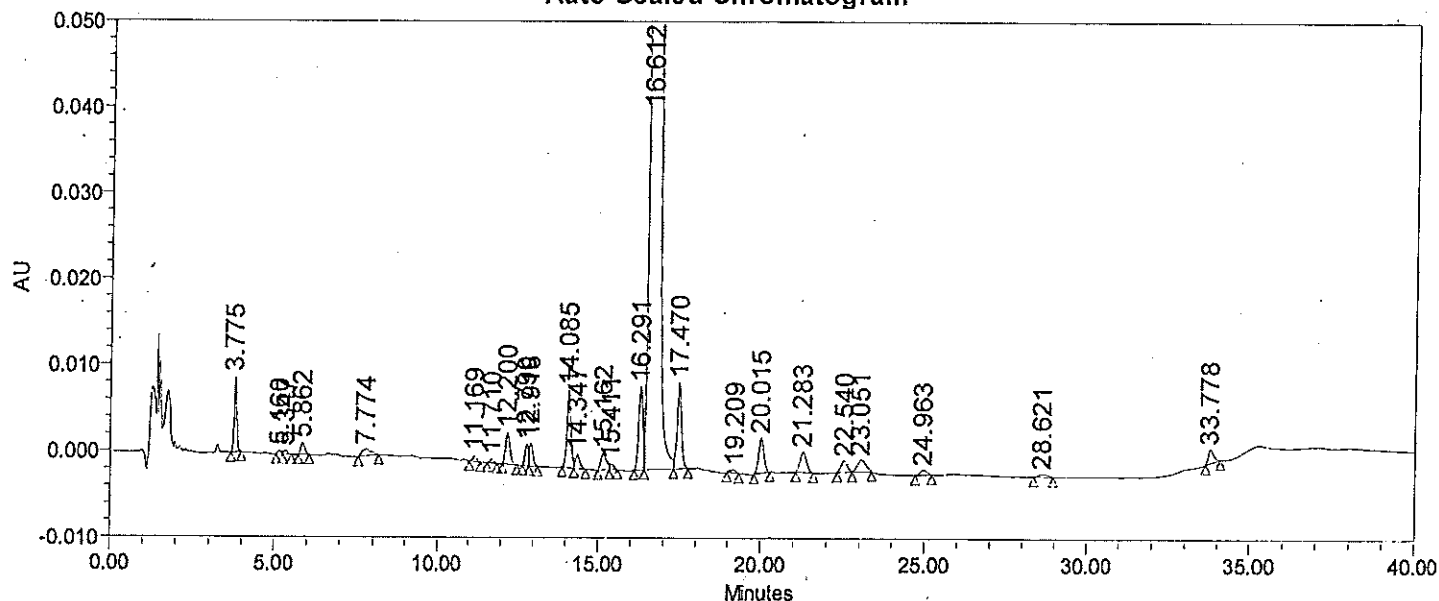

## Peak Results

|    | Name   | RT    | Area  | % Area | RT Ratio | USP Resolution | USP Tailing | USP Plate Count |
|----|--------|-------|-------|--------|----------|----------------|-------------|-----------------|
| 1  | Peak1  | 3.77  | 51020 | 0.20   | 0.227    |                | 1.15        | 9954            |
|    | Peak2  | 5.16  | 2835  | 0.01   | 0.311    |                |             |                 |
| 3  | Peak3  | 5.35  | 3486  | 0.01   | 0.322    |                |             | 5138            |
| 4  | Peak4  | 5.86  | 11636 | 0.04   | 0.353    |                | 1.11        | 9400            |
| 5  | Peak5  | 7.77  | 14786 | 0.06   | 0.468    | 4.48           | 1.25        | 5562            |
| 6  | Peak6  | 11.17 | 5532  | 0.02   | 0.672    | 8.05           | 0.98        | 51195           |
| 7  | Peak7  | 11.71 | 3589  | 0.01   | 0.705    | 2.31           | 1.02        | 60372           |
| 8  | Peak8  | 12.20 | 34378 | 0.13   | 0.734    | 2.02           | 1.25        | 37223           |
| 9  | Peak9  | 12.79 | 18673 | 0.07   | 0.770    |                |             |                 |
| 10 | Peak10 | 12.92 | 20651 | 0.08   | 0.778    |                |             |                 |
| 11 | Peak11 | 14.09 | 77792 | 0.30   | 0.848    |                |             | 62500           |
| 12 | Peak12 | 14.35 | 15043 | 0.06   | 0.864    | 0.90           |             | 47349           |
| 13 | Peak13 | 15.16 | 24259 | 0.09   | 0.913    | 2.27           |             | 31865           |
| 14 | Peak14 | 15.41 | 5877  | 0.02   | 0.928    |                |             |                 |
| 15 | Peak15 | 16.29 | 81829 | 0.32   | 0.981    |                |             | 70687           |

SampleName 0080/st 4/1974/130

Date Acquired 5/12/2009 3:07:37 PM IST

Signature / Date: *[Signature]*  
13/05/09  
Page: 1 of 2

# Peak Results

|    | Name    | RT    | Area     | % Area | RT Ratio | USP Resolution | USP Tailing | USP Plate Count |
|----|---------|-------|----------|--------|----------|----------------|-------------|-----------------|
| 16 | Stage-4 | 16.61 | 25307712 | 97.59  | 1.000    | 1.30           | 1.13        | 80645           |
| 17 | Peak17  | 17.47 | 97279    | 0.38   | 1.052    | 3.47           |             | 77537           |
| 18 | Peak18  | 19.21 | 4581     | 0.02   | 1.156    | 5.96           | 0.75        | 65531           |
| 19 | Peak19  | 20.02 | 45778    | 0.18   | 1.205    | 2.56           | 1.03        | 70197           |
| 20 | Peak20  | 21.28 | 32395    | 0.12   | 1.281    | 3.73           | 1.12        | 53336           |
| 21 | Peak21  | 22.54 | 17330    | 0.07   | 1.357    | 3.35           | 0.98        | 59651           |
| 22 | Peak22  | 23.05 | 24793    | 0.10   | 1.388    | 1.17           | 1.08        | 34474           |
| 23 | Peak23  | 24.96 | 8064     | 0.03   | 1.503    | 4.28           | 1.00        | 49134           |
| 24 | Peak24  | 28.62 | 5340     | 0.02   | 1.723    | 8.17           | 1.11        | 44386           |
| 25 | Peak25  | 33.78 | 18313    | 0.07   | 2.033    | 12.45          | 1.32        | 171446          |

LC-MS of Sertindole

LCMS\_Nov\_10\_039 168 (7.866) Cm (168:169-(146:159+179:194))

1: Scan ES+  
3.00e6

407

Des-chloro 2

%

0 140 160 180 200 220 240 260 280 300 320 340 360 380 400 420 440 460 480 500 520 540 m/z

LC-MS of Sertindole

LCMS\_Nov\_10\_039 165 (7.725) Cm (165-(125:154+175:199))

1: Scan ES+  
7.67e5

Bis-aryl 28

553

100

%

m/z

775

750

725

700

675

650

625

600

575

550

525

500

475

450

425

400

375

350

325



LC-MS of Sertindole

LCMS\_Nov\_10\_039 259 (12.146) Cm (259-(215:248+263:298))

1: Scan ES+  
9.15e6

*N*-oxide 29

457

100

%

0 250 300 350 400 450 500 550 600 650 700 750 800 m/z

LC-MS of Sertindole

LCMS\_Nov\_10\_039 248 (11.629)

1: Scan ES+  
2.60e7

Nor-Sertindole 9

329

%

0 100 140 160 180 200 220 240 260 280 300 320 340 360 380 400 420 440 460 480 500 520 540 560 580 600 m/z

LC-MS of Sertindole

LCMS\_Nov\_10\_039 291 (13.651) Cm (291-(270:289+295:304))

1: Scan ES+  
2.63e6

423

Des-fluoro 3

%

m/z

675

650

625

600

575

550

525

500

475

450

425

400

375

350

325

300

275

250

225

200

LC-MS of Serindole  
LCMS\_Nov\_10\_039 309 (14.498)

1: Scan ES+  
3.05e7

Serindole !

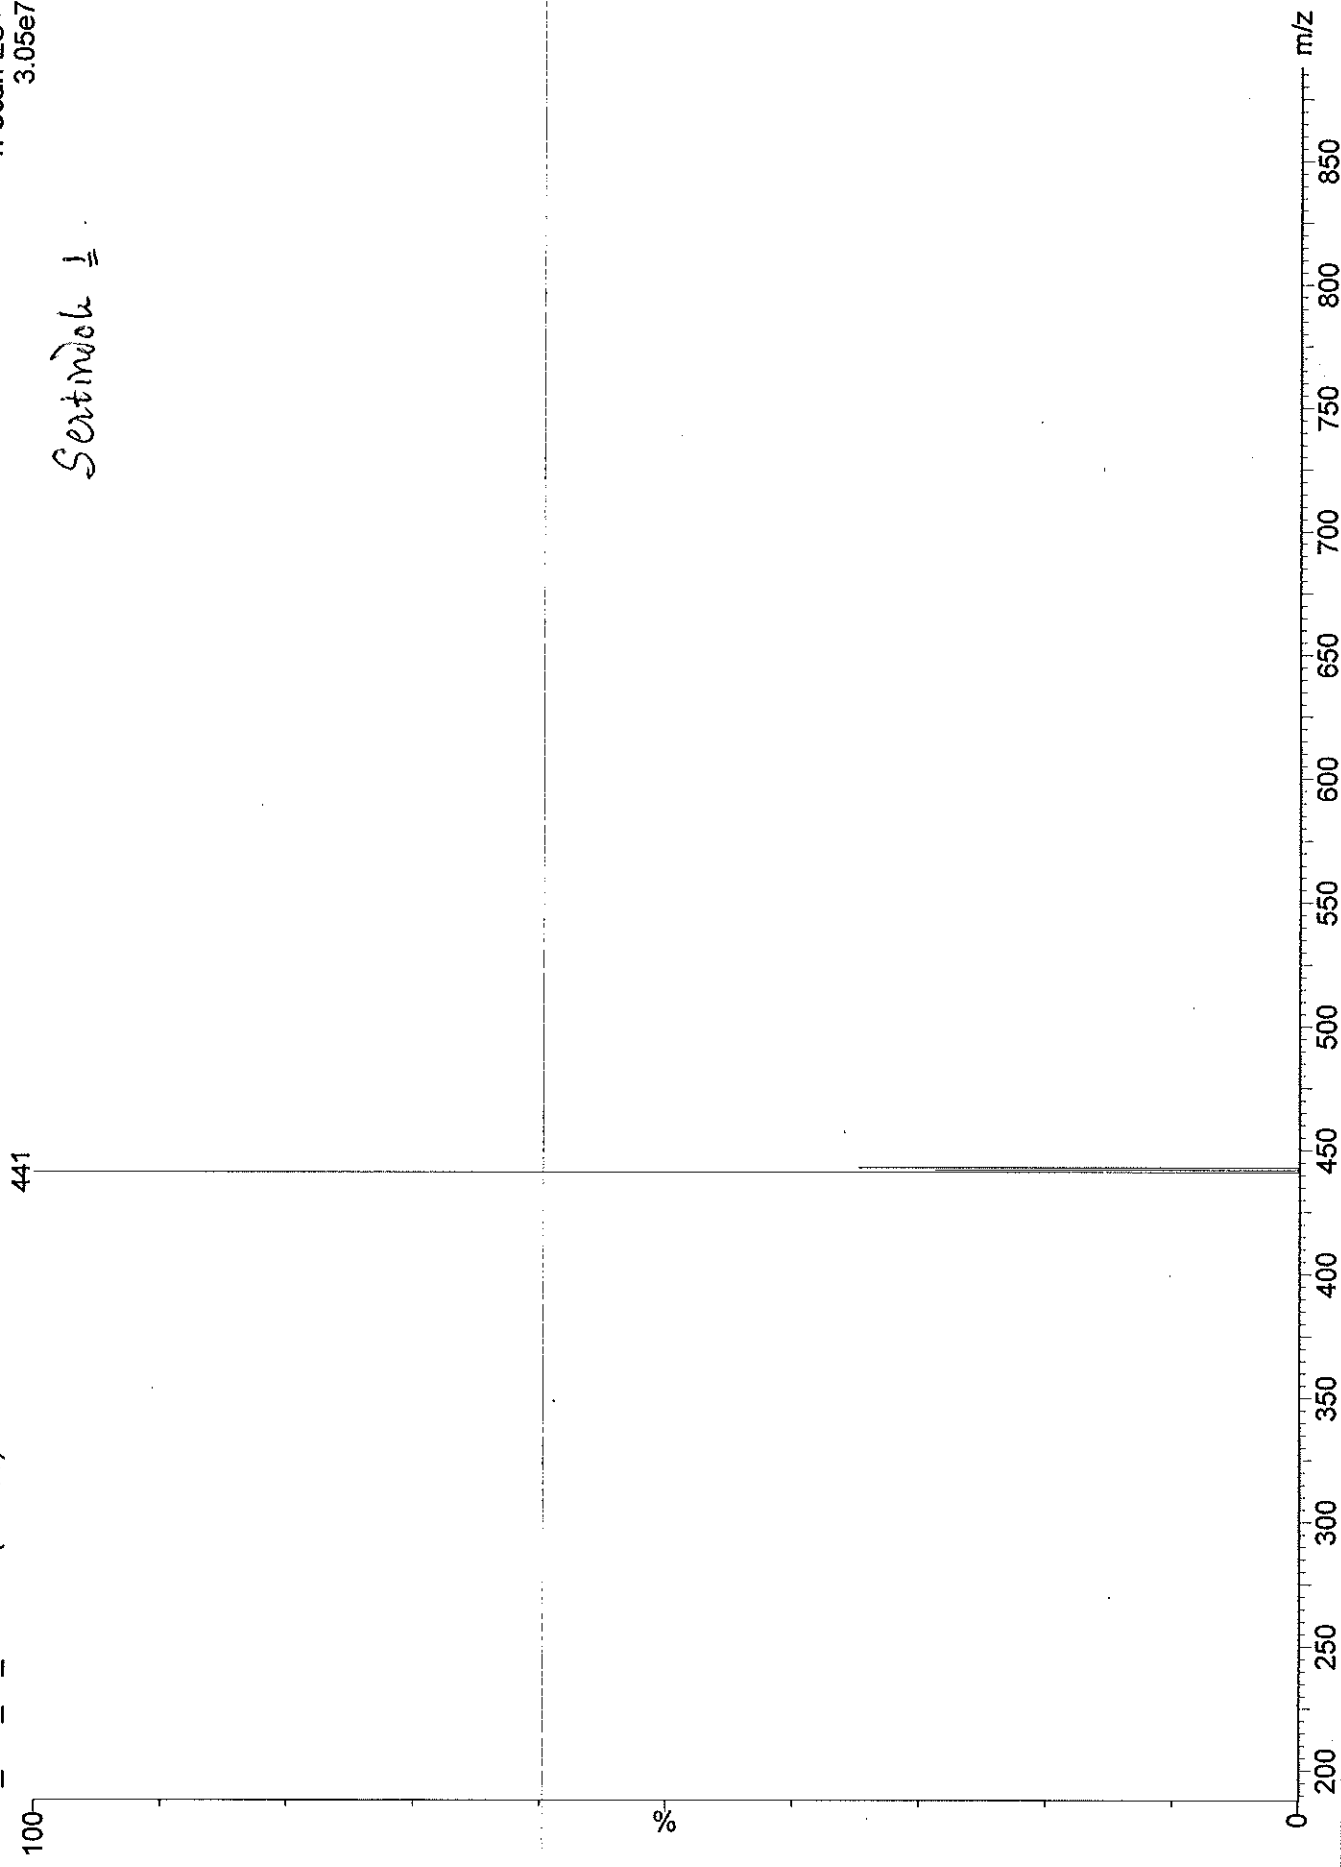

LC-MS of Sertindole

LCMS\_Nov\_10\_039 355 (16.662)

1: Scan ES+  
1.21e6

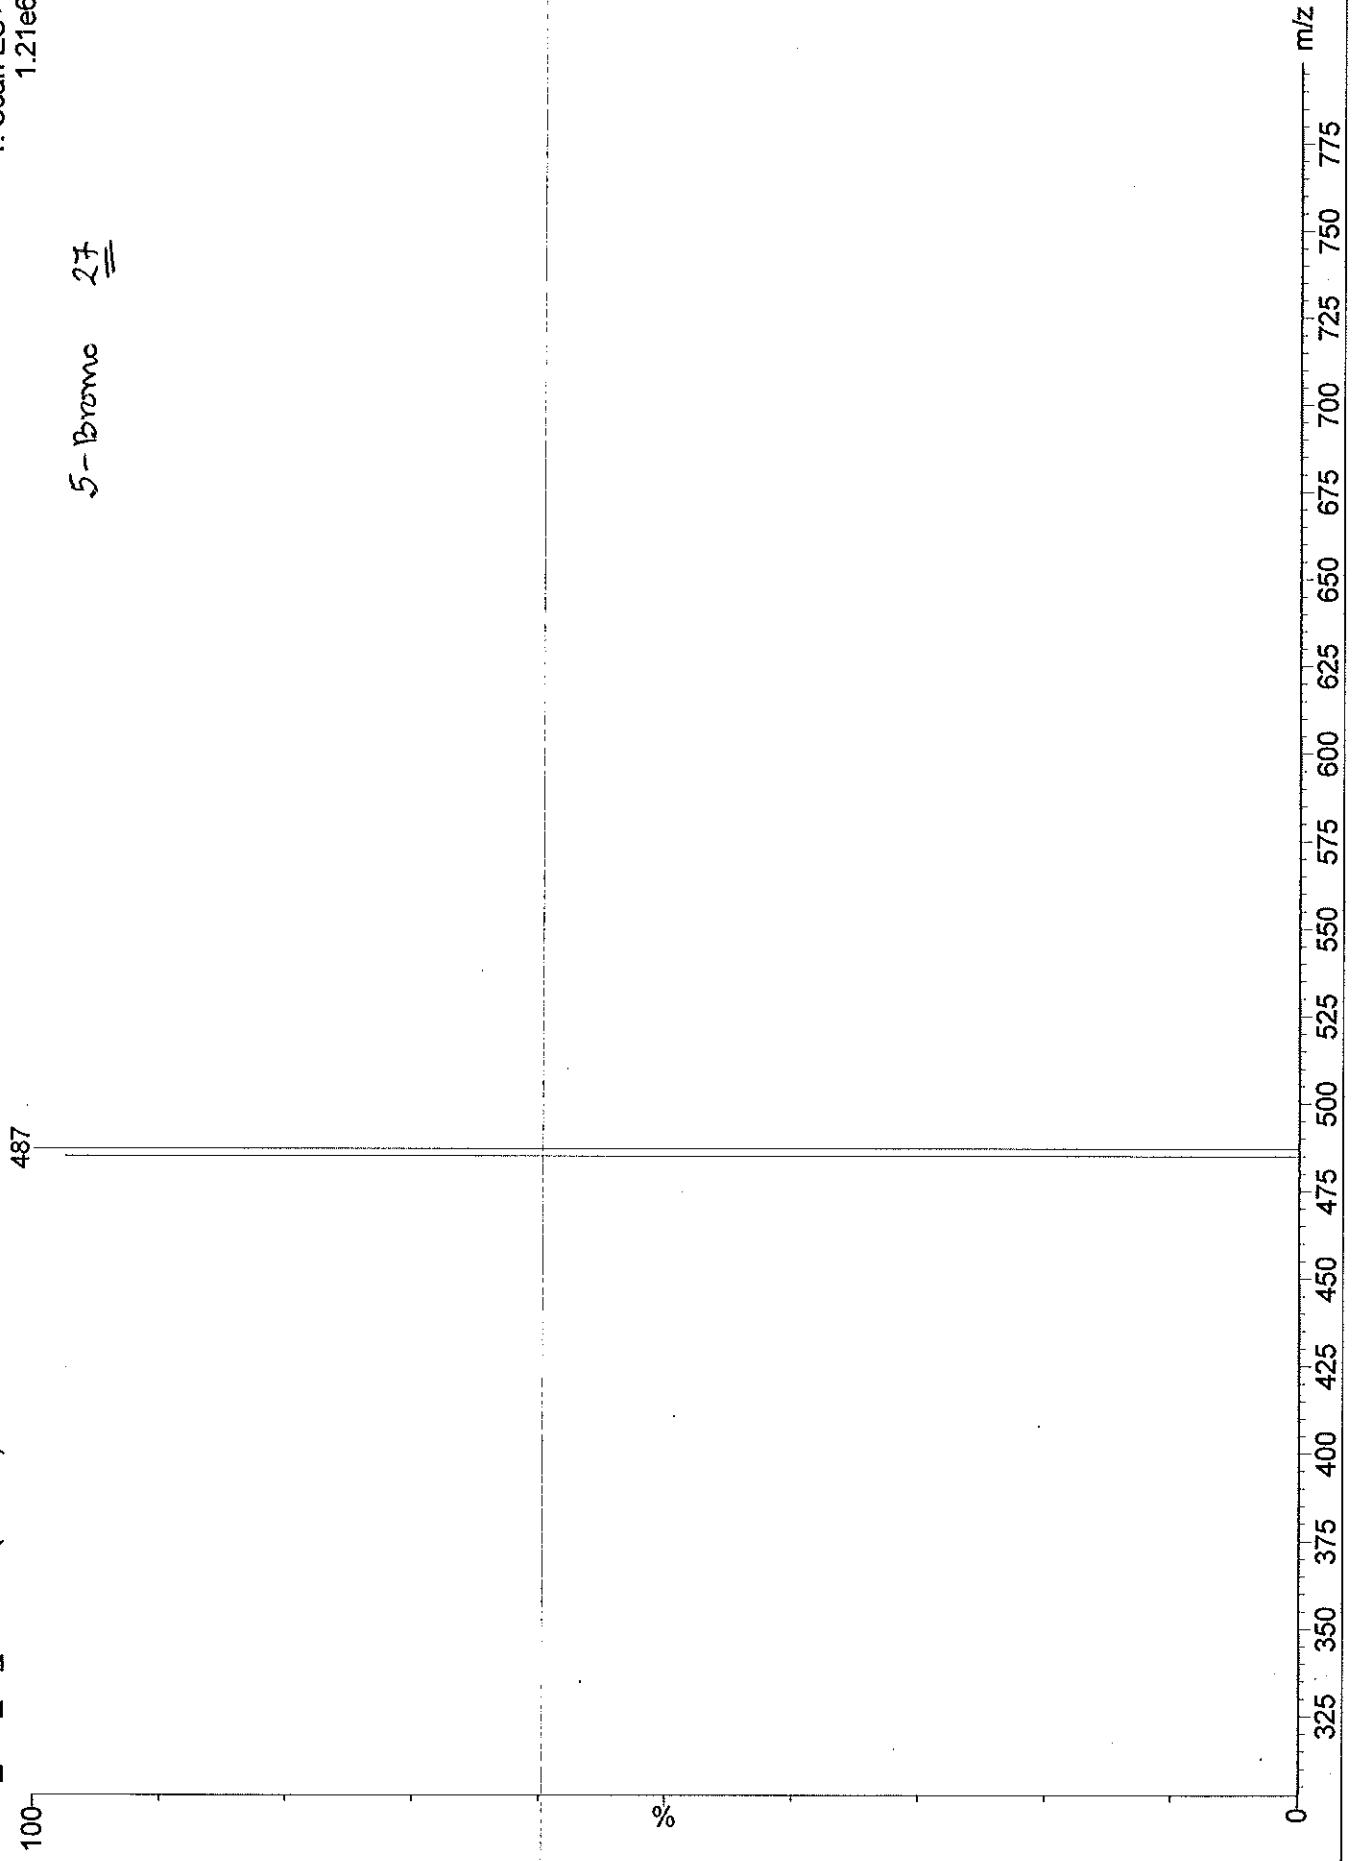

5-Bromo 27

LC-MS of Sertindole

LCMS\_Nov\_10\_039 401 (18.825)

1: Scan ES+  
6.61e6

Anhydro 5

439

%

m/z

260 280 300 320 340 360 380 400 420 440 460 480 500 520 540 560 580 600 620 640 660 680

LC-MS of Sertindole  
LCMS\_Nov\_10\_039 528 (24.798)

1: Scan ES+  
7.04e5

1- (4-Bromo phenyl) 21

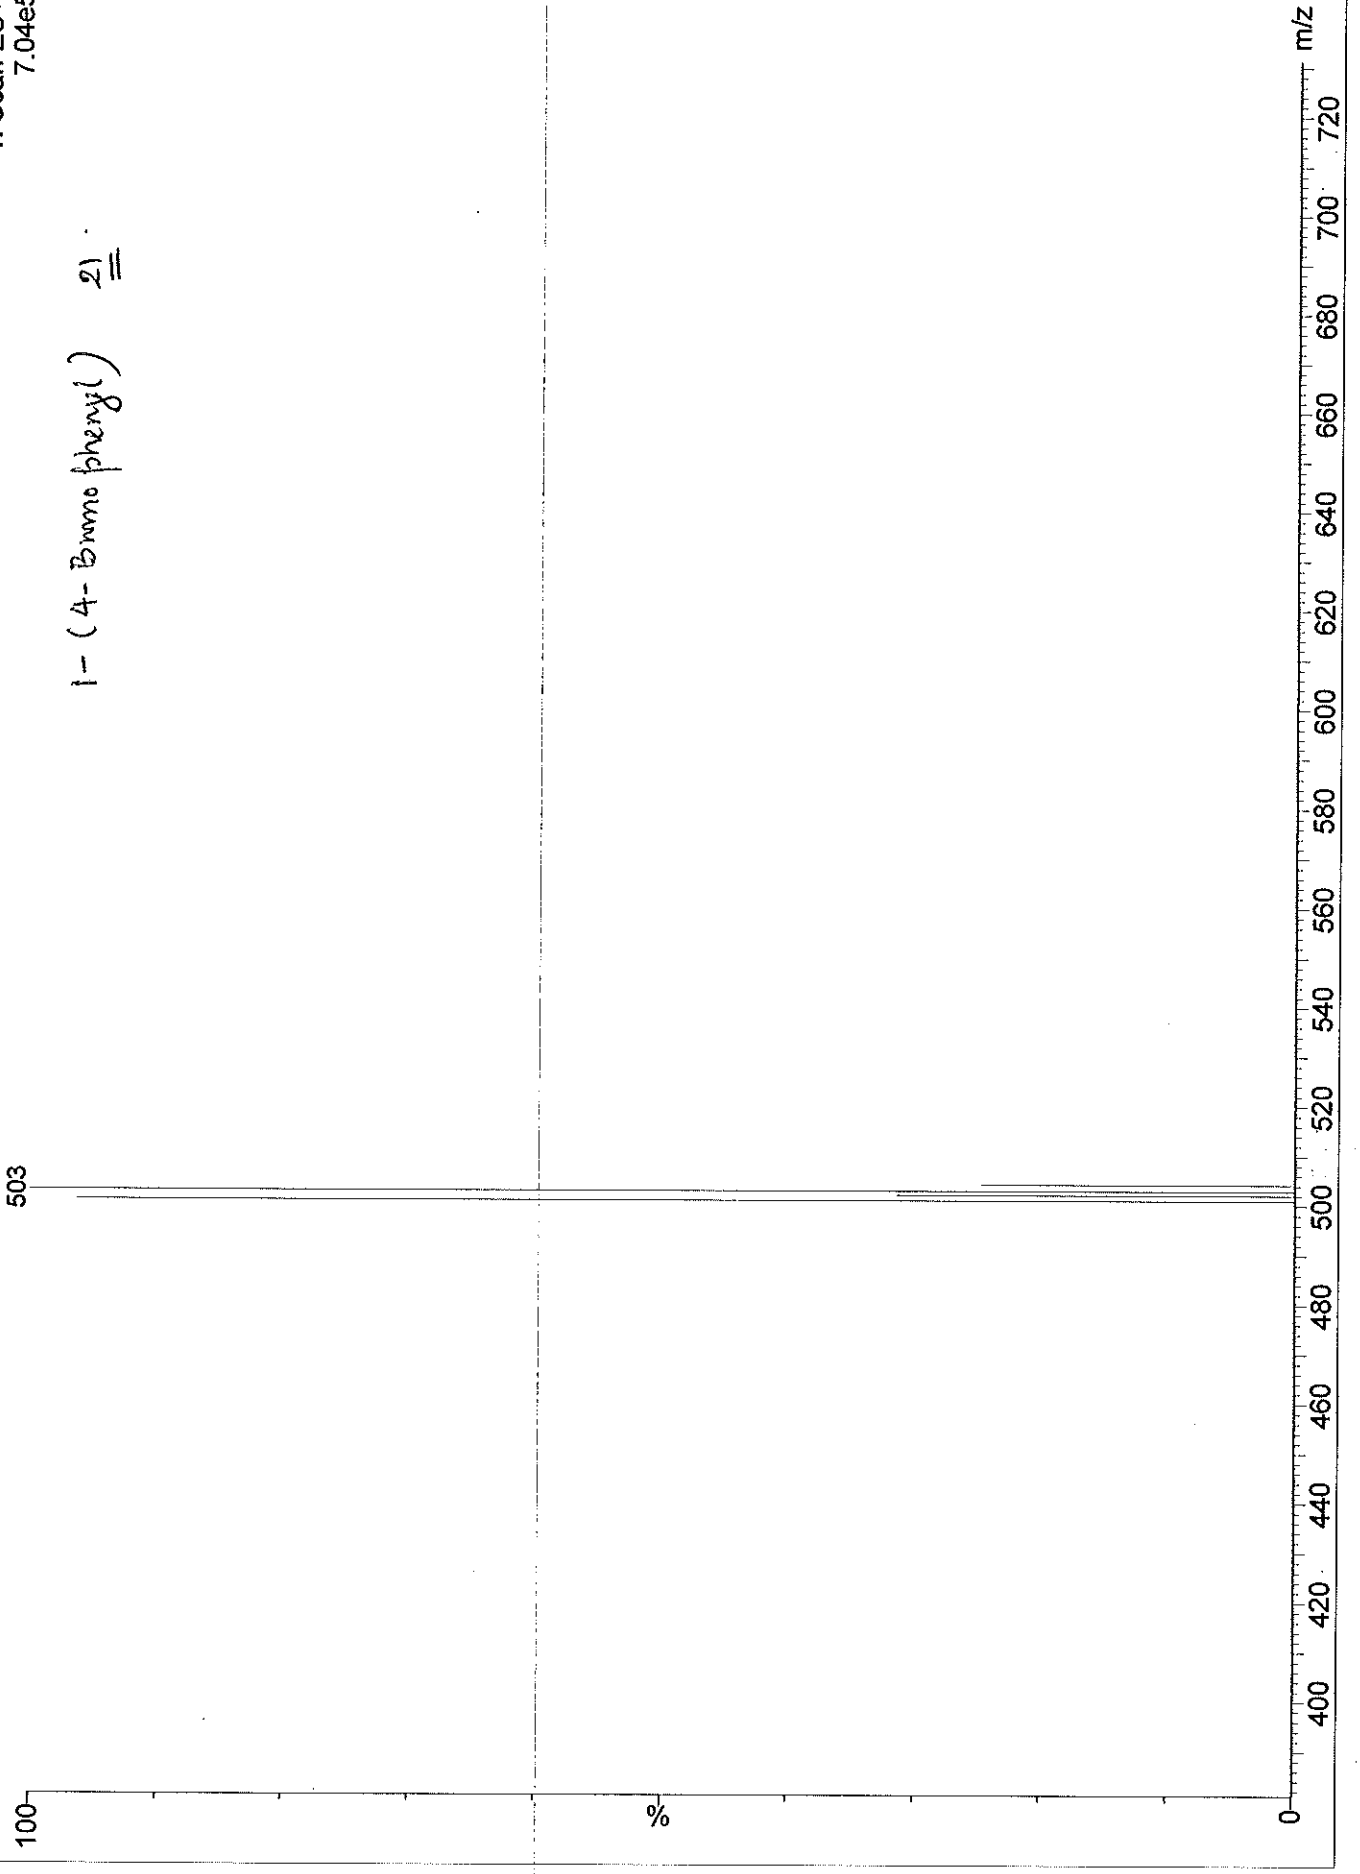

Supplement: Additional file 2 [file 1860-5397-7-5-S2.pdf]
